# Supplementary material for: Real Time Viral Sub-Strains Discovery in Emerging Infectious Disease Situation – The African Perspective
Source: Research Square preprint supplement (doi:10.21203/rs.3.rs-103476/v2), 2020-11-13
Supplement: Supplementary file 1 [file 25d130b1c1e33ee0a09af7ae.xlsx]

## Sheet: MALE
Real Time Viral Sub-Strains Discovery in Emerging Infectious Disease Situation – The African Perspective
Moses Ekpenyong1*, Mercy Edoho1, Udoinyang Inyang1, Faith-Michael Uzoka2, Ifiok Udo1, Nseobong Uto3, Itemobong Ekaidem4, Anietie Moses4, Enoabasi Anwana5, Youchou Tatfeng6, Geoffery Joseph1, Emmanuel Dan1, Juliana Ndunagu7
1Department of Computer Science, University of Uyo, Nigeria
2Department of Mathematics and Computing, Mount Royal University, Canada
3School of Mathematics and Statistics, University of Saint Andrews, United Kingdom
4College of Health Sciences, University of Uyo, Nigeria
5Department of Botany and Ecological Studies, University of Uyo, Nigeria
6College of Health Sciences, Niger Delta University, Nigeria
7Department of Computer Science, National Open University, Nigeria
* – Corresponding Author
SupplData1_1.xlsx: Metadata on extracted genome sequence
S/no.	Country	State	Abbreviation	Accession No.	Length	Travel history	Specimen source	Status	Submitting Lab	Authors
1	Algeria	Blida	ABl	EPI_ISL_418242	29730	unknown	unknown	Hospitalized	National Reference Center for Viruses of Respiratory Infections, Institut Pasteur, Paris	Mélanie Albert, Marion Barbet, Sylvie Behillil, Méline Bizard, Angela Brisebarre, Flora Donati, Etienne Simon-Lorière, Vincent Enouf, Maud Vanpeene, Sylvie van der Werf, Fawzi Derrar
2	Algeria	Blida	ABl	EPI_ISL_420037	29822	unknown	unknown	Hospitalized	National Reference Center for Viruses of Respiratory Infections, Institut Pasteur, Paris	Mélanie Albert, Marion Barbet, Sylvie Behillil, Méline Bizard, Angela Brisebarre, Flora Donati, Etienne Simon-Lorière, Vincent Enouf, Maud Vanpeene, Sylvie van der Werf, Fawzi Derrar
3	Benin	Cotonou	BCo	EPI_ISL_476831	29804	Travel history to France	Oro-pharyngeal swab	unknown	Charité-Universitätsmedizin Berlin	Yadouleton, Anges; Sander Anna-Lena; Moreira-Soto Andres; Drexler, Jan Felix
4	Benin	Cotonou	BCo	EPI_ISL_476830	29804	Travel history to Belgium	Oro-pharyngeal swab	unknown	Charité-Universitätsmedizin Berlin	Yadouleton, Anges; Sander Anna-Lena; Moreira-Soto Andres; Drexler, Jan Felix
5	Benin	Cotonou	BCo	EPI_ISL_476828	29581	unknown	Oro-pharyngeal swab	unknown	Charité-Universitätsmedizin Berlin	Yadouleton, Anges; Sander Anna-Lena; Moreira-Soto Andres; Drexler, Jan Felix
6	Benin	Cotonou	BCo	EPI_ISL_476827	29799	travel to Belgium	Oro-pharyngeal swab	unknown	Charité-Universitätsmedizin Berlin	Yadouleton, Anges; Sander Anna-Lena; Moreira-Soto Andres; Drexler, Jan Felix
7	Benin	Oueme	BOu	EPI_ISL_476822	29804	unknown	Oro-pharyngeal swab	unknown	Charité-Universitätsmedizin Berlin	Yadouleton, Anges; Sander Anna-Lena; Moreira-Soto Andres; Drexler, Jan Felix
8	Cameroon	Yaounde	CYa	EPI_ISL_512873	29686	unknown	Nasopharyngeal swab	Live	Virology Service, Centre Pasteur of Cameroun	Richard Njouom and Serge Alain SADEUH-Mba
9	DRC	Haut-Katanga	DHa	EPI_ISL_513597	29798	unknown	unknown	unknown	Pathogen Sequencing Lab, National Institute for Biomedical Research (INRB)	Placide Mbala-Kingebeni, Edith Nkwembe, Eddy Kinganda-Lusamaki, Amuri Aziza, Francisca Muyembe Mawete, Emmanuel Lokilo Lofiko, Catherine Pratt, Matthias Pauthner, Josh Quick, Allison Black, James Hadfield, Trevor Bedford, Ian Goodfellow, Andrew Rambaut, N
10	DRC	Haut-Katanga	DHa	EPI_ISL_471413	29813	unknown	unknown	unknown	Pathogen Sequencing Lab, National Institute for Biomedical Research (INRB)	Placide Mbala-Kingebeni, Edith Nkwembe, Eddy Kinganda-Lusamaki, Amuri Aziza, Francisca Muyembe Mawete, Emmanuel Lokilo Lofiko, Catherine Pratt, Matthias Pauthner, Josh Quick, Allison Black, James Hadfield, Trevor Bedford, Ian Goodfellow, Andrew Rambaut, N
11	DRC	Haut-Katanga	DHa	EPI_ISL_471411	29816	unknown	unknown	unknown	Pathogen Sequencing Lab, National Institute for Biomedical Research (INRB)	Placide Mbala-Kingebeni, Edith Nkwembe, Eddy Kinganda-Lusamaki, Amuri Aziza, Francisca Muyembe Mawete, Emmanuel Lokilo Lofiko, Catherine Pratt, Matthias Pauthner, Josh Quick, Allison Black, James Hadfield, Trevor Bedford, Ian Goodfellow, Andrew Rambaut, N
12	DRC	Kinshasha	DKi	EPI_ISL_527570	29648	unknown	unknown	unknown	Pathogen Sequencing Lab, National Institute for Biomedical Research (INRB)	Placide Mbala-Kingebeni, Edith Nkwembe, Eddy Kinganda-Lusamaki, Amuri Aziza, Francisca Muyembe Mawete, Emmanuel Lokilo Lofiko, Catherine Pratt, Matthias Pauthner, Josh Quick, Allison Black, James Hadfield, Trevor Bedford, Ian Goodfellow, Andrew Rambaut, Nick Loman, Kristian Andersen, Michael Wiley, Steve Ahuka-Mundeke, Jean-Jacques Muyembe Tamfum
13	DRC	Kinshasha	DKi	EPI_ISL_527569	29753	unknown	unknown	unknown	Pathogen Sequencing Lab, National Institute for Biomedical Research (INRB)	Placide Mbala-Kingebeni, Edith Nkwembe, Eddy Kinganda-Lusamaki, Amuri Aziza, Francisca Muyembe Mawete, Emmanuel Lokilo Lofiko, Catherine Pratt, Matthias Pauthner, Josh Quick, Allison Black, James Hadfield, Trevor Bedford, Ian Goodfellow, Andrew Rambaut, Nick Loman, Kristian Andersen, Michael Wiley, Steve Ahuka-Mundeke, Jean-Jacques Muyembe Tamfum
14	DRC	Kinshasha	DKi	EPI_ISL_527567	29630	unknown	unknown	unknown	Pathogen Sequencing Lab, National Institute for Biomedical Research (INRB)	Placide Mbala-Kingebeni, Edith Nkwembe, Eddy Kinganda-Lusamaki, Amuri Aziza, Francisca Muyembe Mawete, Emmanuel Lokilo Lofiko, Catherine Pratt, Matthias Pauthner, Josh Quick, Allison Black, James Hadfield, Trevor Bedford, Ian Goodfellow, Andrew Rambaut, N
15	DRC	Kinshasha	DKi	EPI_ISL_527566	29626	unknown	unknown	unknown	Pathogen Sequencing Lab, National Institute for Biomedical Research (INRB)	Placide Mbala-Kingebeni, Edith Nkwembe, Eddy Kinganda-Lusamaki, Amuri Aziza, Francisca Muyembe Mawete, Emmanuel Lokilo Lofiko, Catherine Pratt, Matthias Pauthner, Josh Quick, Allison Black, James Hadfield, Trevor Bedford, Ian Goodfellow, Andrew Rambaut, N
16	DRC	Kongo Central	DKC	EPI_ISL_527558	29642	unknown	unknown	unknown	Pathogen Sequencing Lab, National Institute for Biomedical Research (INRB)	Placide Mbala-Kingebeni, Edith Nkwembe, Eddy Kinganda-Lusamaki, Amuri Aziza, Francisca Muyembe Mawete, Emmanuel Lokilo Lofiko, Catherine Pratt, Matthias Pauthner, Josh Quick, Allison Black, James Hadfield, Trevor Bedford, Ian Goodfellow, Andrew Rambaut, N
17	DRC	Kongo Central	DKC	EPI_ISL_527544	29666	unknown	unknown	unknown	Pathogen Sequencing Lab, National Institute for Biomedical Research (INRB)	Placide Mbala-Kingebeni, Edith Nkwembe, Eddy Kinganda-Lusamaki, Amuri Aziza, Francisca Muyembe Mawete, Emmanuel Lokilo Lofiko, Catherine Pratt, Matthias Pauthner, Josh Quick, Allison Black, James Hadfield, Trevor Bedford, Ian Goodfellow, Andrew Rambaut, N
18	DRC	Kongo Central	DKC	EPI_ISL_527521	29598	unknown	unknown	unknown	Pathogen Sequencing Lab, National Institute for Biomedical Research (INRB)	Placide Mbala-Kingebeni, Edith Nkwembe, Eddy Kinganda-Lusamaki, Amuri Aziza, Francisca Muyembe Mawete, Emmanuel Lokilo Lofiko, Catherine Pratt, Matthias Pauthner, Josh Quick, Allison Black, James Hadfield, Trevor Bedford, Ian Goodfellow, Andrew Rambaut, N
19	DRC	Kongo Central	DKC	EPI_ISL_513624	29865	unknown	unknown	unknown	Pathogen Sequencing Lab, National Institute for Biomedical Research (INRB)	Placide Mbala-Kingebeni, Edith Nkwembe, Eddy Kinganda-Lusamaki, Amuri Aziza, Francisca Muyembe Mawete, Emmanuel Lokilo Lofiko, Catherine Pratt, Matthias Pauthner, Josh Quick, Allison Black, James Hadfield, Trevor Bedford, Ian Goodfellow, Andrew Rambaut, N
20	DRC	Nord Kivu	DNK	EPI_ISL_527547	29647	unknown	unknown	unknown	Pathogen Sequencing Lab, National Institute for Biomedical Research (INRB)	Placide Mbala-Kingebeni, Edith Nkwembe, Eddy Kinganda-Lusamaki, Amuri Aziza, Francisca Muyembe Mawete, Emmanuel Lokilo Lofiko, Catherine Pratt, Matthias Pauthner, Josh Quick, Allison Black, James Hadfield, Trevor Bedford, Ian Goodfellow, Andrew Rambaut, N
21	DRC	Sud Kivu	DSK	EPI_ISL_420841	29815	unknown	unknown	unknown	Pathogen Sequencing Lab, National Institute for Biomedical Research (INRB)	Placide Mbala-Kingebeni, Edith Nkwembe, Eddy Kinganda-Lusamaki, Amuri Aziza, Francisca Muyembe Mawete, Emmanuel Lokilo Lofiko, Catherine Pratt, Matthias Pauthner, Josh Quick, Allison Black, James Hadfield, Trevor Bedford, Ian Goodfellow, Andrew Rambaut, N
22	DRC	Sud Kivu	DSK	EPI_ISL_420840	29711	unknown	unknown	unknown	Pathogen Sequencing Lab, National Institute for Biomedical Research (INRB)	Placide Mbala-Kingebeni, Edith Nkwembe, Eddy Kinganda-Lusamaki, Amuri Aziza, Francisca Muyembe Mawete, Emmanuel Lokilo Lofiko, Catherine Pratt, Matthias Pauthner, Josh Quick, Allison Black, James Hadfield, Trevor Bedford, Ian Goodfellow, Andrew Rambaut, N
23	DRC	Sud Kivu	DSK	EPI_ISL_527492	29624	unknown	unknown	unknown	Pathogen Sequencing Lab, National Institute for Biomedical Research (INRB)	Placide Mbala-Kingebeni, Edith Nkwembe, Eddy Kinganda-Lusamaki, Amuri Aziza, Francisca Muyembe Mawete, Emmanuel Lokilo Lofiko, Catherine Pratt, Matthias Pauthner, Josh Quick, Allison Black, James Hadfield, Trevor Bedford, Ian Goodfellow, Andrew Rambaut, N
24	Egypt	Cairo	ECa	EPI_ISL_529031	29787	unknown	Nasopharyngeal swab	released	Next Generation Sequencing Reference Laboratory, Faculty of Medicine, Cairo University and The Center for Genome and Microbiome Research, Faculty of Pharmacy, CAIRO UNIVERSITY	May Sherif Soliman, May Abdelfattah, Ramy Karam Aziz
25	Egypt	Cairo	ECa	EPI_ISL_483038	29828	unknown	unknown	live	Medical Ain Shams Research Institute (MASRI), Ain Shams University	Hesham Elghazaly, Sara Hassan Agwa, Ahmad Moustafa, Hala Hafez, Sara Elnakeep, Shaimaa Moustafa, Aya Mohamed, Reham Mamdouh, Ghada Ismael, Ashraf Omar, Osama Mansour, Mahmoud Elmeitini
26	Egypt	Cairo	ECa	EPI_ISL_483036	29816	unknown	unknown	live	Medical Ain Shams Research Institute (MASRI), Ain Shams University	Hesham Elghazaly, Sara Hassan Agwa, Ahmad Moustafa, Hala Hafez, Sara Elnakeep, Shaimaa Moustafa, Aya Mohamed, Reham Mamdouh, Ghada Ismael, Ashraf Omar, Osama Mansour, Mahmoud Elmeitini
27	Egypt	Cairo	ECa	EPI_ISL_483035	29834	unknown	unknown	Live	Medical Ain Shams Research Institute (MASRI), Ain Shams University	Hesham Elghazaly, Sara Hassan Agwa, Ahmad Moustafa, Hala Hafez, Sara Elnakeep, Shaimaa Moustafa, Aya Mohamed, Reham Mamdouh, Ghada Ismael, Ashraf Omar, Osama Mansour, Mahmoud Elmeitini
28	Egypt	Kalyoubia	EKa	EPI_ISL_483037	29824	unknown	unknown	Live	Medical Ain Shams Research Institute (MASRI), Ain Shams University	Hesham Elghazaly, Sara Hassan Agwa, Ahmad Moustafa, Hala Hafez, Sara Elnakeep, Shaimaa Moustafa, Aya Mohamed, Reham Mamdouh, Ghada Ismael, Ashraf Omar, Osama Mansour, Mahmoud Elmeitini
29	Gambia	Kombo	GKo	EPI_ISL_471171	29782	unknown	unknown	released	MRCG at LSHTM Genomics lab	Sesay et al
30	Gambia	Kombo	GKo	EPI_ISL_471170	29782	unknown	unknown	unknown	MRCG at LSHTM Genomics lab	Sesay et al
31	Gambia	Kombo	GKo	EPI_ISL_471169	29782	unknown	unknown	released	MRCG at LSHTM Genomics lab	Sesay et al
32	Gambia	Kombo	GKo	EPI_ISL_471168	29782	unknown	unknown	released	MRCG at LSHTM Genomics lab	Sesay et al
33	Gambia	West Coast Region	GWC	EPI_ISL_428857	29782	unknown	unknown	unknown	MRCG at LSHTM Genomics lab	Sesay et al
34	Gambia	West Coast Region	GWC	EPI_ISL_428856	29782	unknown	unknown	deceased	MRCG at LSHTM Genomics lab	Sesay et al
35	Ghana	Greater Ghana	GhG	EPI_ISL_422406	29810	unknown	oro-nasopharyngeal	unknown	WACCBIP, University of Ghana	Joyce M. Ngoi, Bright Adu, Collins M. Morang’a, Selassie Kumordjie, Miriam Eshun, Linda Boatemaa, Vanessa Magnussen, Erasmus Kotey, Fred Tei-Maya, Dominic S. Y. Amuzu, Peter Quashie, Augustina Arjarquah, Ivy Asante, Evelyn Bonney, George B. Kyei, Kofi Bonney, Abraham Kwabena Anang, Gordon A. Awandare, William Ampofo
36	Ghana	Greater Ghana	GhG	EPI_ISL_422404	29810	unknown	oro-nasopharyngeal	unknown	WACCBIP, University of Ghana	Joyce M. Ngoi, Bright Adu, Collins M. Morang’a, Selassie Kumordjie, Miriam Eshun, Linda Boatemaa, Vanessa Magnussen, Erasmus Kotey, Fred Tei-Maya, Dominic S. Y. Amuzu, Peter Quashie, Augustina Arjarquah, Ivy Asante, Evelyn Bonney, George B. Kyei, Kofi Bon
37	Ghana	Greater Ghana	GhG	EPI_ISL_422401	29810	unknown	oro-nasopharyngeal	unknown	WACCBIP, University of Ghana	Joyce M. Ngoi, Bright Adu, Collins M. Morang’a, Selassie Kumordjie, Miriam Eshun, Linda Boatemaa, Vanessa Magnussen, Erasmus Kotey, Fred Tei-Maya, Dominic S. Y. Amuzu, Peter Quashie, Augustina Arjarquah, Ivy Asante, Evelyn Bonney, George B. Kyei, Kofi Bon
38	Ghana	Greater Ghana	GhG	EPI_ISL_422400	29810	unknown	oro-nasopharyngeal	unknown	WACCBIP, University of Ghana	Joyce M. Ngoi, Bright Adu, Collins M. Morang’a, Selassie Kumordjie, Miriam Eshun, Linda Boatemaa, Vanessa Magnussen, Erasmus Kotey, Fred Tei-Maya, Dominic S. Y. Amuzu, Peter Quashie, Augustina Arjarquah, Ivy Asante, Evelyn Bonney, George B. Kyei, Kofi Bon
39	Kenya	Unknown	KEN	EPI_ISL_457936	29014	unknown	unknown	unknown	KEMRI-Wellcome Trust Research Programme/KEMRI-CGMR-C Kilifi	Githinji G. et al 2020
40	Kenya	Unknown	KEN	EPI_ISL_457850	29494	unknown	unknown	unknown	KEMRI-Wellcome Trust Research Programme/KEMRI-CGMR-C Kilifi	Githinji G. et al 2020
41	Kenya	Unknown	KEN	EPI_ISL_457881	29485	unknown	unknown	unknown	KEMRI-Wellcome Trust Research Programme/KEMRI-CGMR-C Kilifi	Githinji G. et al 2020
42	Kenya	Unknown	KEN	EPI_ISL_457868	29782	unknown	unknown	unknown	KEMRI-Wellcome Trust Research Programme/KEMRI-CGMR-C Kilifi	Githinji G. et al 2020
43	Mali	Bamako	MlB	EPI_ISL_487466	29782	unknown	Oro-pharyngeal swab	unknown	Bundeswehr Institut of Microbiology	Kouriba, Dürr, Sangaré, Rehn, Traoré, Bestehorn-Willmann, Walter, Quedraogo, Zimmermann, Maiga, Heitzer, Sogodogo, Antwerpen, Wölfel
44	Mali	Bamako	MlB	EPI_ISL_487464	29782	unknown	Oro-pharyngeal swab	unknown	Bundeswehr Institut of Microbiology	Kouriba, Dürr, Sangaré, Rehn, Traoré, Bestehorn-Willmann, Walter, Quedraogo, Zimmermann, Maiga, Heitzer, Sogodogo, Antwerpen, Wölfel
45	Mali	Bamako	MlB	EPI_ISL_487463	29782	unknown	Oro-pharyngeal swab	unknown	Bundeswehr Institut of Microbiology	Kouriba, Dürr, Sangaré, Rehn, Traoré, Bestehorn-Willmann, Walter, Quedraogo, Zimmermann, Maiga, Heitzer, Sogodogo, Antwerpen, Wölfel
46	Mali	Bamako	MlB	EPI_ISL_487462	29782	unknown	Oro-pharyngeal swab	unknown	Bundeswehr Institut of Microbiology	Kouriba, Dürr, Sangaré, Rehn, Traoré, Bestehorn-Willmann, Walter, Quedraogo, Zimmermann, Maiga, Heitzer, Sogodogo, Antwerpen, Wölfel
47	Mali	Mopti	MlM	EPI_ISL_487447	29810	unknown	Oro-pharyngeal swab	unknown	Bundeswehr Institut of Microbiology	Kouriba, Dürr, Sangaré, Rehn, Traoré, Bestehorn-Willmann, Walter, Quedraogo, Zimmermann, Maiga, Heitzer, Sogodogo, Antwerpen, Wölfel
48	Morocco	Casablanca	MoC	EPI_ISL_458150	29838	unknown	Nasopharyngeal swab	unknown	ANOUAL	Jouali Farah, El Ansari Fatima Zahra, Marchoudi Nabila, Kasmi Yassine, Chenaoui Mohamed, El Aliani Aissam, Benhida Rachid, Azami Nawfel, Kitane Driss Lahlou, Loukman Salma, Fekkak Jamal
49	Morocco	Ouarzazate	MoO	EPI_ISL_451400	29934	unknown	Nasopharyngeal swab	unknown	Laboratoire de Recherche et d'Analyse Médicale de la Gendarmerie Royale	Sanaâ LEMRISS, Amal SOUIRI, Saâd EL KABBAJ
50	Morocco	Rabat	MoR	EPI_ISL_471460	29835	unknown	Oro-pharyngeal swab	released	Functional Genomic Platform/Service Analyses Biologique/UATRS/ Centre National Pour la Recherche Scientifique Et Technique (CNRST)	Hicham ANNAZ, Elmostafa EL FAHIME, Marouane MELLOUL, Yassine AKHOUAD, Mly Abdelaziz ELALAOUI, Ahmed REGGAD, Sanaa ALAOUI-Amine , Rachid ABI, Rida TAGAJDID, Zhor KASMY, Safaa ELKORCHI, Nadia TOUIL, Farida HILALI, Abdelkader LAATIRIS , Abdelillah LARAQUI, Tahra BAJJOU , Yassine SEKHSOKH , Idriss-Amine LAHLOU, Mostafa ELOUENNASS, Khalid ENNIBI
51	Morocco	Rabat	MoR	EPI_ISL_471459	29834	unknown	Oro-pharyngeal swab	released	Functional Genomic Platform/Service Analyses Biologique/UATRS/ Centre National Pour la Recherche Scientifique Et Technique (CNRST)	Hicham ANNAZ, Elmostafa EL FAHIME, Marouane MELLOUL, Yassine AKHOUAD, Mly Abdelaziz ELALAOUI, Ahmed REGGAD, Sanaa ALAOUI-Amine , Rachid ABI, Rida TAGAJDID, Zhor KASMY, Safaa ELKORCHI, Nadia TOUIL, Farida HILALI, Abdelkader LAATIRIS , Abdelillah LARAQUI,
52	Morocco	Rabat	MoR	EPI_ISL_471458	29834	unknown	Oro-pharyngeal swab	released	Functional Genomic Platform/Service Analyses Biologique/UATRS/ Centre National Pour la Recherche Scientifique Et Technique (CNRST)	Hicham ANNAZ, Elmostafa EL FAHIME, Marouane MELLOUL, Yassine AKHOUAD, Mly Abdelaziz ELALAOUI, Ahmed REGGAD, Sanaa ALAOUI-Amine , Rachid ABI, Rida TAGAJDID, Zhor KASMY, Safaa ELKORCHI, Nadia TOUIL, Farida HILALI, Abdelkader LAATIRIS , Abdelillah LARAQUI,
53	Nigeria	Kwara	NKw	EPI_ISL_487107	29859	unknown	unknown	Hospitalized	African Centre of Excellence for Genomics of Infectious Diseases (ACEGID), Redeemer's University, Ede, Osun State, Nigeria	Oluniyi P.E., Ajogbasile F.V., Kayode A., Oguzie J., Olawoye I., Uwanibe J., Olumade T., Folarin O.A., Ihekweazu C., Happi C.T.
54	Nigeria	Kwara	NKw	EPI_ISL_487095	29777	unknown	unknown	Hospitalized	African Centre of Excellence for Genomics of Infectious Diseases (ACEGID), Redeemer's University, Ede, Osun State, Nigeria	Oluniyi P.E., Ajogbasile F.V., Kayode A., Oguzie J., Olawoye I., Uwanibe J., Olumade T., Folarin O.A., Ihekweazu C., Happi C.T.
55	Nigeria	Kwara	NKw	EPI_ISL_455362	29815	unknown	saliva and Nasopharyngeal swab	isolation	African Centre of Excellence for Genomics of Infectious Diseases (ACEGID), Redeemer's University, Ede, Osun State, Nigeria	Oluniyi P.E., Ajogbasile F.V., Kayode A., Oguzie J., Olawoye I., Uwanibe J., Olumade T., Folarin O.A., Ihekweazu C., Happi C.T.
56	Nigeria	Lagos	NLa	EPI_ISL_413550	29759	patient infected in Italy	sputum	Hospitalized	African Centre of Excellence for Genomics of Infectious Diseases (ACEGID), Redeemer's University, Ede, Osun State, Nigeria	Oluniyi P.E., Ajogbasile F.V., Kayode A., Oguzie J., Olawoye I., Uwanibe J., Olumade T., Folarin O.A., Ihekweazu C., Happi C.T.
57	Nigeria	Osun	NOs	EPI_ISL_487113	29903	unknown	nasal swab	unknown	African Centre of Excellence for Genomics of Infectious Diseases (ACEGID), Redeemer's University, Ede, Osun State, Nigeria	Oluniyi P.E., Ajogbasile F.V., Kayode A., Oguzie J., Olawoye I., Uwanibe J., Olumade T., Folarin O.A., Ihekweazu C., Happi C.T.
58	Nigeria	Osun	NOs	EPI_ISL_455427	29770	unknown	saliva and Nasopharyngeal swab	not hospitalized	African Centre of Excellence for Genomics of Infectious Diseases (ACEGID), Redeemer's University, Ede, Osun State, Nigeria	Oluniyi P.E., Ajogbasile F.V., Kayode A., Oguzie J., Olawoye I., Uwanibe J., Olumade T., Folarin O.A., Ihekweazu C., Happi C.T.
59	Nigeria	Osun	NOs	EPI_ISL_455425	29772	unknown	saliva and Nasopharyngeal swab	not hospitalized	African Centre of Excellence for Genomics of Infectious Diseases (ACEGID), Redeemer's University, Ede, Osun State, Nigeria	Oluniyi P.E., Ajogbasile F.V., Kayode A., Oguzie J., Olawoye I., Uwanibe J., Olumade T., Folarin O.A., Ihekweazu C., Happi C.T.
60	Nigeria	Osun	NOs	EPI_ISL_455422	29846	unknown	saliva and Nasopharyngeal swab	not hospitalized	African Centre of Excellence for Genomics of Infectious Diseases (ACEGID), Redeemer's University, Ede, Osun State, Nigeria	Oluniyi P.E., Ajogbasile F.V., Kayode A., Oguzie J., Olawoye I., Uwanibe J., Olumade T., Folarin O.A., Ihekweazu C., Happi C.T.
61	Nigeria	Oyo	NOy	EPI_ISL_455429	29865	unknown	saliva and nasal swab	not hospitalized	African Centre of Excellence for Genomics of Infectious Diseases (ACEGID), Redeemer's University, Ede, Osun State, Nigeria	Oluniyi P.E., Ajogbasile F.V., Kayode A., Oguzie J., Olawoye I., Uwanibe J., Olumade T., Folarin O.A., Ihekweazu C., Happi C.T.
62	Nigeria	Oyo	NOy	EPI_ISL_455430	29829	unknown	Nasopharyngeal swab	Hospitalized	African Centre of Excellence for Genomics of Infectious Diseases (ACEGID), Redeemer's University, Ede, Osun State, Nigeria	Oluniyi P.E., Ajogbasile F.V., Kayode A., Oguzie J., Olawoye I., Uwanibe J., Olumade T., Folarin O.A., Ihekweazu C., Happi C.T.
63	Nigeria	Oyo	NOy	EPI_ISL_455431	29813	unknown	saliva and nasal swab	not hospitalized	African Centre of Excellence for Genomics of Infectious Diseases (ACEGID), Redeemer's University, Ede, Osun State, Nigeria	Oluniyi P.E., Ajogbasile F.V., Kayode A., Oguzie J., Olawoye I., Uwanibe J., Olumade T., Folarin O.A., Ihekweazu C., Happi C.T.
64	Nigeria	Oyo	NOy	EPI_ISL_487090	29816	unknown	nasal swab	Hospitalized	African Centre of Excellence for Genomics of Infectious Diseases (ACEGID), Redeemer's University, Ede, Osun State, Nigeria	Oluniyi P.E., Ajogbasile F.V., Kayode A., Oguzie J., Olawoye I., Uwanibe J., Olumade T., Folarin O.A., Ihekweazu C., Happi C.T.
65	Nigeria	Unknown	NGA	EPI_ISL_522550	29782	patient infected while travelling to Greece	unknown	unknown	UMR PIMIT Université de La Réunion	David Wilkinson, Camille Lebarbenchon, Patrick Mavingui
66	Senegal	Dakar	SDa	EPI_ISL_498252	29680	Unkown	Nasopharyngeal swab		Institut Pasteur de Dakar	Ndongo Dia, Moussa Moise Diagne, Mamadou Diop, Marie Henriette Dior Ndione, Mamadou Malado Jallow, Safietou Sankhe Mbengue, Ousmane Faye, Amadou Alpha Sall.
67	Senegal	Dakar	SDa	EPI_ISL_486869	29300	Unkown	Nasopharyngeal swab	Released	Institut Pasteur de Dakar	Ndongo Dia, Moussa Moise Diagne, Mamadou Diop, Marie Henriette Dior Ndione, Mamadou Malado Jallow, Safietou Sankhe Mbengue, Ousmane Faye, Amadou Alpha Sall.
68	Senegal	Dakar	SDa	EPI_ISL_486861	29812	Unkown	Nasopharyngeal swab	Released	Institut Pasteur de Dakar	Ndongo Dia, Moussa Moise Diagne, Mamadou Diop, Marie Henriette Dior Ndione, Mamadou Malado Jallow, Safietou Sankhe Mbengue, Ousmane Faye, Amadou Alpha Sall.
69	Senegal	Dakar	SDa	EPI_ISL_481220	29631	Unkown	Nasopharyngeal swab	Released	Institut Pasteur de Dakar	Ndongo Dia, Moussa Moise Diagne, Mamadou Diop, Marie Henriette Dior Ndione, Mamadou Malado Jallow, Safietou Sankhe Mbengue, Ousmane Faye, Amadou Alpha Sall.
70	Senegal	Diourbel	SDi	EPI_ISL_418210	29828	imported case from Cesena-Dakar	Oro and naso pharyngeal swabs	Released	Institut Pasteur de Dakar	Ndongo Dia, Ousmane Faye, Amadou Alpha Sall
71	Senegal	Diourbel	SDi	EPI_ISL_418215	29794	Unkown	Combined nasopharyngeal and oropharyngeal swab	Released	Institut Pasteur de Dakar	Ndongo Dia, Moussa Moise Diagne, Mamadou Diop, Marie Henriette Dior Ndione, Mamadou Malado Jallow, Safietou Sankhe Mbengue, Ousmane Faye, Amadou Alpha Sall.
72	Senegal	Diourbel	SDi	EPI_ISL_418213	29793	Unkown	Combined nasopharyngeal and oropharyngeal swab	Released	Institut Pasteur de Dakar	Ndongo Dia, Moussa Moise Diagne, Mamadou Diop, Marie Henriette Dior Ndione, Mamadou Malado Jallow, Safietou Sankhe Mbengue, Ousmane Faye, Amadou Alpha Sall.
73	Senegal	Kolda	SKo	EPI_ISL_480789	29803	Unkown	Combined nasopharyngeal and oropharyngeal swab	Released	Institut Pasteur de Dakar	Ndongo Dia, Moussa Moise Diagne, Mamadou Diop, Marie Henriette Dior Ndione, Mamadou Malado Jallow, Safietou Sankhe Mbengue, Ousmane Faye, Amadou Alpha Sall.
74	Senegal	Pikine	SPi	EPI_ISL_498234	29312	Unkown	Nasopharyngeal swab	Released	Institut Pasteur de Dakar	Ndongo Dia, Moussa Moise Diagne, Mamadou Diop, Marie Henriette Dior Ndione, Mamadou Malado Jallow, Safietou Sankhe Mbengue, Ousmane Faye, Amadou Alpha Sall.
75	Senegal	St Louis	SSl	EPI_ISL_480783	29805	Unkown	Combined nasopharyngeal and oropharyngeal swab	Released	Institut Pasteur de Dakar	Ndongo Dia, Moussa Moise Diagne, Mamadou Diop, Marie Henriette Dior Ndione, Mamadou Malado Jallow, Safietou Sankhe Mbengue, Ousmane Faye, Amadou Alpha Sall.
76	Senegal	St Louis	SSl	EPI_ISL_480556	29731	Unkown	Combined nasopharyngeal and oropharyngeal swab	Released	Institut Pasteur de Dakar	Ndongo Dia, Moussa Moise Diagne, Mamadou Diop, Marie Henriette Dior Ndione, Mamadou Malado Jallow, Safietou Sankhe Mbengue, Ousmane Faye, Amadou Alpha Sall.
77	Senegal	St Louis	SSl	EPI_ISL_420074	29813	Unkown	Combined nasopharyngeal and oropharyngeal swab	Released	Institut Pasteur de Dakar	Ndongo Dia, Moussa Moise Diagne, Mamadou Diop, Marie Henriette Dior Ndione, Mamadou Malado Jallow, Safietou Sankhe Mbengue, Ousmane Faye, Amadou Alpha Sall.
78	Senegal	Thies	STh	EPI_ISL_420079	29813	Unkown	Combined nasopharyngeal and oropharyngeal swab	Released	Institut Pasteur de Dakar	Ndongo Dia, Moussa Moise Diagne, Mamadou Diop, Marie Henriette Dior Ndione, Mamadou Malado Jallow, Safietou Sankhe Mbengue, Ousmane Faye, Amadou Alpha Sall.
79	Senegal	Thies	STh	EPI_ISL_420072	29798	Unkown	Combined nasopharyngeal and oropharyngeal swab	Released	Institut Pasteur de Dakar	Ndongo Dia, Moussa Moise Diagne, Mamadou Diop, Ousmane Faye , Amadou Alpha Sall
80	South Africa	Amajuba	SAm	EPI_ISL_529801	29857	Unknown	Oro-pharyngeal swab	Live	KRISP, KZN Research Innovation and Sequencing Platform	Giandhari J, Pillay S, Lessells R, Mdlalose K, York D, Khan S, Tegally H, Wilkinson E, de Oliveira T
81	South Africa	Amajuba	SAm	EPI_ISL_515780	29822	Unknown	Oro-pharyngeal swab	Live	KRISP, KZN Research Innovation and Sequencing Platform	Giandhari J, Pillay S, Lessells R, Mdlalose K, York D, Khan S, Tegally H, Wilkinson E, de Oliveira T
82	South Africa	Amajuba	SAm	EPI_ISL_515779	29813	Unknown	Oro-pharyngeal swab	Live	KRISP, KZN Research Innovation and Sequencing Platform	Giandhari J, Pillay S, Lessells R, Mdlalose K, York D, Khan S, Tegally H, Wilkinson E, de Oliveira T
83	South Africa	Amajuba	SAm	EPI_ISL_515685	29845	Unknown	Oro-pharyngeal swab	Live	KRISP, KZN Research Innovation and Sequencing Platform	Giandhari J, Pillay S, Lessells R, Mdlalose K, York D, Khan S, Tegally H, Wilkinson E, de Oliveira T
84	South Africa	Berea	SBe	EPI_ISL_467468	29826	Unknown	Oro-pharyngeal swab	Live	KRISP, KZN Research Innovation and Sequencing Platform	Giandhari J, Pillay S, Lessells R, Mdlalose K, York D, Khan S, Tegally H, Wilkinson E, de Oliveira T
85	South Africa	Berea	SBe	EPI_ISL_467451	29872	Unknown	Oro-pharyngeal swab	Live	KRISP, KZN Research Innovation and Sequencing Platform	Giandhari J, Pillay S, Lessells R, Mdlalose K, York D, Khan S, Tegally H, Wilkinson E, de Oliveira T
86	South Africa	Berea	SBe	EPI_ISL_467450	29875	Unknown	Oro-pharyngeal swab	Live	KRISP, KZN Research Innovation and Sequencing Platform	Giandhari J, Pillay S, Lessells R, Mdlalose K, York D, Khan S, Tegally H, Wilkinson E, de Oliveira T
87	South Africa	Cape Town Metro	SCT	EPI_ISL_464157	29836	Unkown	Oro-pharyngeal swab	unknown	Division of Medical Virology, Stellenbosch University and National Health Laboratory Service (NHLS)	Susan Engelbrecht, Kayla Delaney, Bronwyn Kleinhans, Houriiyah Tegally, Eduan Wilkindon, Gert van Zyl, Wolfgang Preiser, Tulio de Oliveira
88	South Africa	Cape Town Metro	SCT	EPI_ISL_464156	29726	Unkown	Oro-pharyngeal swab	unknown	Division of Medical Virology, Stellenbosch University and National Health Laboratory Service (NHLS)	Susan Engelbrecht, Kayla Delaney, Bronwyn Kleinhans, Houriiyah Tegally, Eduan Wilkindon, Gert van Zyl, Wolfgang Preiser, Tulio de Oliveira
89	South Africa	Cape Town Metro	SCT	EPI_ISL_464152	29370	Unkown	Oro-pharyngeal swab	unknown	Division of Medical Virology, Stellenbosch University and National Health Laboratory Service (NHLS)	Susan Engelbrecht, Kayla Delaney, Bronwyn Kleinhans, Houriiyah Tegally, Eduan Wilkindon, Gert van Zyl, Wolfgang Preiser, Tulio de Oliveira
90	South Africa	Cape Town Metro	SCT	EPI_ISL_464151	29356	Unkown	Oro-pharyngeal swab	unknown	Division of Medical Virology, Stellenbosch University and National Health Laboratory Service (NHLS)	Susan Engelbrecht, Kayla Delaney, Bronwyn Kleinhans, Houriiyah Tegally, Eduan Wilkindon, Gert van Zyl, Wolfgang Preiser, Tulio de Oliveira
91	South Africa	EC	SEC	EPI_ISL_470879	29899	Unknown	Combined nasopharyngeal and oropharyngeal swab	unknown	National Institute for Communicable Diseases of the National Health Laboratory Service	Allam M, Ismail A, Khumalo Z, Kwenda S, Mtshali P, Mnyameni F, Mohale T, Subramoney K, Bhiman JN
92	South Africa	eThekwini	SeT	EPI_ISL_529762	29818	Unknown	Oro-pharyngeal swab	Live	KRISP, KZN Research Innovation and Sequencing Platform	Giandhari J, Pillay S, Lessells R, Mdlalose K, York D, Khan S, Tegally H, Wilkinson E, de Oliveira T
93	South Africa	eThekwini	SeT	EPI_ISL_529759	29821	Unknown	Oro-pharyngeal swab	Live	KRISP, KZN Research Innovation and Sequencing Platform	Giandhari J, Pillay S, Lessells R, Mdlalose K, York D, Khan S, Tegally H, Wilkinson E, de Oliveira T
94	South Africa	eThekwini	SeT	EPI_ISL_529756	29851	Unknown	Oro-pharyngeal swab	Live	KRISP, KZN Research Innovation and Sequencing Platform	Giandhari J, Pillay S, Lessells R, Mdlalose K, York D, Khan S, Tegally H, Wilkinson E, de Oliveira T
95	South Africa	eThekwini	SeT	EPI_ISL_529731	29830	Unknown	Oro-pharyngeal swab	Live	KRISP, KZN Research Innovation and Sequencing Platform	Giandhari J, Pillay S, Lessells R, Mdlalose K, York D, Khan S, Tegally H, Wilkinson E, de Oliveira T
96	South Africa	Harry Gwala	SHG	EPI_ISL_498077	29832	Unknown	Oro-pharyngeal swab	Live	KRISP, KZN Research Innovation and Sequencing Platform	Giandhari J, Pillay S, Lessells R, Mdlalose K, York D, Khan S, Tegally H, Wilkinson E, de Oliveira T
97	South Africa	Harry Gwala	SHG	EPI_ISL_498072	28857	Unknown	Oro-pharyngeal swab	Live	KRISP, KZN Research Innovation and Sequencing Platform	Giandhari J, Pillay S, Lessells R, Mdlalose K, York D, Khan S, Tegally H, Wilkinson E, de Oliveira T
98	South Africa	Harry Gwala	SHG	EPI_ISL_495530	29857	Unknown	Oro-pharyngeal swab	Live	KRISP, KZN Research Innovation and Sequencing Platform	Giandhari J, Pillay S, Lessells R, Mdlalose K, York D, Khan S, Tegally H, Wilkinson E, de Oliveira T
99	South Africa	Harry Gwala	SHG	EPI_ISL_495527	29820	Unknown	Oro-pharyngeal swab	Live	KRISP, KZN Research Innovation and Sequencing Platform	Giandhari J, Pillay S, Lessells R, Mdlalose K, York D, Khan S, Tegally H, Wilkinson E, de Oliveira T
100	South Africa	Ilembe	SIl	EPI_ISL_529798	29866	Unknown	Oro-pharyngeal swab	Live	KRISP, KZN Research Innovation and Sequencing Platform	Giandhari J, Pillay S, Lessells R, Mdlalose K, York D, Khan S, Tegally H, Wilkinson E, de Oliveira T
101	South Africa	Ilembe	SIl	EPI_ISL_529797	29818	Unknown	Oro-pharyngeal swab	Live	KRISP, KZN Research Innovation and Sequencing Platform	Giandhari J, Pillay S, Lessells R, Mdlalose K, York D, Khan S, Tegally H, Wilkinson E, de Oliveira T
102	South Africa	Ilembe	SIl	EPI_ISL_529794	29850	Unknown	Oro-pharyngeal swab	Live	KRISP, KZN Research Innovation and Sequencing Platform	Giandhari J, Pillay S, Lessells R, Mdlalose K, York D, Khan S, Tegally H, Wilkinson E, de Oliveira T
103	South Africa	Ilembe	SIl	EPI_ISL_529790	29835	Unknown	Oro-pharyngeal swab	Live	KRISP, KZN Research Innovation and Sequencing Platform	Giandhari J, Pillay S, Lessells R, Mdlalose K, York D, Khan S, Tegally H, Wilkinson E, de Oliveira T
104	South Africa	King Cetshwayo	SKC	EPI_ISL_515759	29822	Unknown	Oro-pharyngeal swab	Live	KRISP, KZN Research Innovation and Sequencing Platform	Giandhari J, Pillay S, Lessells R, Mdlalose K, York D, Khan S, Tegally H, Wilkinson E, de Oliveira T
105	South Africa	King Cetshwayo	SKC	EPI_ISL_515758	29824	Unknown	Oro-pharyngeal swab	Live	KRISP, KZN Research Innovation and Sequencing Platform	Giandhari J, Pillay S, Lessells R, Mdlalose K, York D, Khan S, Tegally H, Wilkinson E, de Oliveira T
106	South Africa	King Cetshwayo	SKC	EPI_ISL_515752	29823	Unknown	Oro-pharyngeal swab	Live	KRISP, KZN Research Innovation and Sequencing Platform	Giandhari J, Pillay S, Lessells R, Mdlalose K, York D, Khan S, Tegally H, Wilkinson E, de Oliveira T
107	South Africa	King Cetshwayo	SKC	EPI_ISL_515743	29859	Unknown	Oro-pharyngeal swab	Live	KRISP, KZN Research Innovation and Sequencing Platform	Giandhari J, Pillay S, Lessells R, Mdlalose K, York D, Khan S, Tegally H, Wilkinson E, de Oliveira T
108	South Africa	KZN	SKz	EPI_ISL_535487	29861	Unknown	Oro-pharyngeal swab	Live	KRISP, KZN Research Innovation and Sequencing Platform	Giandhari J, Pillay S, Lessells R, Mdlalose K, York D, Khan S, Tegally H, Wilkinson E, de Oliveira T
109	South Africa	KZN	SKz	EPI_ISL_535485	29821	iLembe	Oro-pharyngeal swab	Live	KRISP, KZN Research Innovation and Sequencing Platform	Giandhari J, Pillay S, Lessells R, Mdlalose K, York D, Khan S, Tegally H, Wilkinson E, de Oliveira T
110	South Africa	KZN	SKz	EPI_ISL_535484	29866	iLembe	Oro-pharyngeal swab	Live	KRISP, KZN Research Innovation and Sequencing Platform	Giandhari J, Pillay S, Lessells R, Mdlalose K, York D, Khan S, Tegally H, Wilkinson E, de Oliveira T
111	South Africa	KZN	SKz	EPI_ISL_535479	29818	iLembe	Oro-pharyngeal swab	Live	KRISP, KZN Research Innovation and Sequencing Platform	Giandhari J, Pillay S, Lessells R, Mdlalose K, York D, Khan S, Tegally H, Wilkinson E, de Oliveira T
112	South Africa	MP	SMp	EPI_ISL_450297	29883	Unknown	Combined nasopharyngeal and oropharyngeal swab	unknown	National Institute for Communicable Diseases of the National Health Laboratory Service	Allam M, Ismail A, Khumalo Z, Kwenda S, van Heusden P, Mtshali P, Mnyameni F, Mohale T, Subramoney K, Bhiman JN
113	South Africa	Nort West	SNW	EPI_ISL_504243	29894	Unknown	Nasopharyngeal swab	unknown	National Institute for Communicable Diseases of the National Health Laboratory Service	Allam M, Ismail A, Khumalo Z, Kwenda S, van Heusden P, Mtshali P, Mnyameni F, Mohale T, Subramoney K, Bhiman JN
114	South Africa	Nort West	SNW	EPI_ISL_504229	29865	Unknown	Nasopharyngeal swab	unknown	National Institute for Communicable Diseases of the National Health Laboratory Service	Allam M, Ismail A, Khumalo Z, Kwenda S, van Heusden P, Mtshali P, Mnyameni F, Mohale T, Subramoney K, Bhiman JN
115	South Africa	Nort West	SNW	EPI_ISL_504227	29888	Unknown	Nasopharyngeal swab	unknown	National Institute for Communicable Diseases of the National Health Laboratory Service	Allam M, Ismail A, Khumalo Z, Kwenda S, van Heusden P, Mtshali P, Mnyameni F, Mohale T, Subramoney K, Bhiman JN
116	South Africa	Nort West	SNW	EPI_ISL_504225	29867	Unknown	Nasopharyngeal swab	unknown	National Institute for Communicable Diseases of the National Health Laboratory Service	Allam M, Ismail A, Khumalo Z, Kwenda S, van Heusden P, Mtshali P, Mnyameni F, Mohale T, Subramoney K, Bhiman JN
117	South Africa	Stanger	SSt	EPI_ISL_467493	29850	Unknown	Oro-pharyngeal swab	Live	KRISP, KZN Research Innovation and Sequencing Platform	Giandhari J, Pillay S, Lessells R, Mdlalose K, York D, Khan S, Tegally H, Wilkinson E, de Oliveira T
118	South Africa	Ugu	SUg	EPI_ISL_495558	29831	Unknown	Oro-pharyngeal swab	Live	KRISP, KZN Research Innovation and Sequencing Platform	Giandhari J, Pillay S, Lessells R, Mdlalose K, York D, Khan S, Tegally H, Wilkinson E, de Oliveira T
119	South Africa	Ugu	SUg	EPI_ISL_495556	29872	Unknown	Oro-pharyngeal swab	Live	KRISP, KZN Research Innovation and Sequencing Platform	Giandhari J, Pillay S, Lessells R, Mdlalose K, York D, Khan S, Tegally H, Wilkinson E, de Oliveira T
120	South Africa	Ugu	SUg	EPI_ISL_529730	29857	Unknown	Oro-pharyngeal swab	Live	KRISP, KZN Research Innovation and Sequencing Platform	Giandhari J, Pillay S, Lessells R, Mdlalose K, York D, Khan S, Tegally H, Wilkinson E, de Oliveira T
121	South Africa	Ugu	SUg	EPI_ISL_529745	29871	Unknown	Oro-pharyngeal swab	Live	KRISP, KZN Research Innovation and Sequencing Platform	Giandhari J, Pillay S, Lessells R, Mdlalose K, York D, Khan S, Tegally H, Wilkinson E, de Oliveira T
122	South Africa	Umbilo	SUm	EPI_ISL_467521	29845	Unknown	Oro-pharyngeal swab	unknown	KRISP, KZN Research Innovation and Sequencing Platform	Giandhari J, Pillay S, Lessells R, Mdlalose K, York D, Khan S, Tegally H, Wilkinson E, de Oliveira T
123	South Africa	Umgungundlovu	SUmg	EPI_ISL_515893	29860	Unknown	oro-pharyngeal swab		KRISP, KZN Research Innovation and Sequencing Platform	Giandhari J, Pillay S, Lessells R, ChimukangaraB, Mdlalose K, York D, Khan S, Tegally H, Wilkinson E, de Oliveira T
124	South Africa	Umgungundlovu	SUmg	EPI_ISL_515836	29826	Unknown	Oro-pharyngeal swab	Live	KRISP, KZN Research Innovation and Sequencing Platform	Giandhari J, Pillay S, Lessells R, Mdlalose K, York D, Khan S, Tegally H, Wilkinson E, de Oliveira T
125	South Africa	Umgungundlovu	SUmg	EPI_ISL_515835	29850	Unknown	Oro-pharyngeal swab	Live	KRISP, KZN Research Innovation and Sequencing Platform	Giandhari J, Pillay S, Lessells R, Mdlalose K, York D, Khan S, Tegally H, Wilkinson E, de Oliveira T
126	South Africa	Umgungundlovu	SUmg	EPI_ISL_515789	29857	Unknown	Oro-pharyngeal swab	Live	KRISP, KZN Research Innovation and Sequencing Platform	Giandhari J, Pillay S, Lessells R, Mdlalose K, York D, Khan S, Tegally H, Wilkinson E, de Oliveira T
127	South Africa	Umkhanyakude	SUmk	EPI_ISL_529761	29823	Unknown	Oro-pharyngeal swab	Live	KRISP, KZN Research Innovation and Sequencing Platform	Giandhari J, Pillay S, Lessells R, Mdlalose K, York D, Khan S, Tegally H, Wilkinson E, de Oliveira T
128	South Africa	Umkhanyakude	SUmk	EPI_ISL_529760	29831	Unknown	Oro-pharyngeal swab	Live	KRISP, KZN Research Innovation and Sequencing Platform	Giandhari J, Pillay S, Lessells R, Mdlalose K, York D, Khan S, Tegally H, Wilkinson E, de Oliveira T
129	South Africa	Umkhanyakude	SUmk	EPI_ISL_529753	29819	Unknown	Oro-pharyngeal swab	Live	KRISP, KZN Research Innovation and Sequencing Platform	Giandhari J, Pillay S, Lessells R, Mdlalose K, York D, Khan S, Tegally H, Wilkinson E, de Oliveira T
130	South Africa	Umkhanyakude	SUmk	EPI_ISL_515886	29855	Unknown	Oro-pharyngeal swab	Live	KRISP, KZN Research Innovation and Sequencing Platform	Giandhari J, Pillay S, Lessells R, Mdlalose K, York D, Khan S, Tegally H, Wilkinson E, de Oliveira T
131	South Africa	Umzinyathi	SUmz	EPI_ISL_515839	29856	Unknown	Oro-pharyngeal swab	Live	KRISP, KZN Research Innovation and Sequencing Platform	Giandhari J, Pillay S, Lessells R, Mdlalose K, York D, Khan S, Tegally H, Wilkinson E, de Oliveira T
132	South Africa	Umzinyathi	SUmz	EPI_ISL_515834	29837	Unknown	Oro-pharyngeal swab	Live	KRISP, KZN Research Innovation and Sequencing Platform	Giandhari J, Pillay S, Lessells R, Mdlalose K, York D, Khan S, Tegally H, Wilkinson E, de Oliveira T
133	South Africa	Umzinyathi	SUmz	EPI_ISL_515783	29824	Unknown	Oro-pharyngeal swab	Live	KRISP, KZN Research Innovation and Sequencing Platform	Giandhari J, Pillay S, Lessells R, Mdlalose K, York D, Khan S, Tegally H, Wilkinson E, de Oliveira T
134	South Africa	Umzinyathi	SUmz	EPI_ISL_515718	29816	Unknown	Oro-pharyngeal swab	Live	KRISP, KZN Research Innovation and Sequencing Platform	Giandhari J, Pillay S, Lessells R, Mdlalose K, York D, Khan S, Tegally H, Wilkinson E, de Oliveira T
135	South Africa	Uthukela	SUt	EPI_ISL_529781	29814	Unknown	Oro-pharyngeal swab	Live	KRISP, KZN Research Innovation and Sequencing Platform	Giandhari J, Pillay S, Lessells R, Mdlalose K, York D, Khan S, Tegally H, Wilkinson E, de Oliveira T
136	South Africa	Uthukela	SUt	EPI_ISL_529769	29823	Unknown	Oro-pharyngeal swab	Live	KRISP, KZN Research Innovation and Sequencing Platform	Giandhari J, Pillay S, Lessells R, Mdlalose K, York D, Khan S, Tegally H, Wilkinson E, de Oliveira T
137	South Africa	Uthukela	SUt	EPI_ISL_529741	29816	Unknown	Oro-pharyngeal swab	Live	KRISP, KZN Research Innovation and Sequencing Platform	Giandhari J, Pillay S, Lessells R, Mdlalose K, York D, Khan S, Tegally H, Wilkinson E, de Oliveira T
138	South Africa	Uthukela	SUt	EPI_ISL_529740	29830	Unknown	Oro-pharyngeal swab	Live	KRISP, KZN Research Innovation and Sequencing Platform	Giandhari J, Pillay S, Lessells R, Mdlalose K, York D, Khan S, Tegally H, Wilkinson E, de Oliveira T
139	South Africa	Uthungulu	Suth	EPI_ISL_495554	29704	Unknown	Oro-pharyngeal swab	Live	KRISP, KZN Research Innovation and Sequencing Platform	Giandhari J, Pillay S, Lessells R, Mdlalose K, York D, Khan S, Tegally H, Wilkinson E, de Oliveira T
140	South Africa	Uthungulu	SUth	EPI_ISL_495553	29812	Unknown	Oro-pharyngeal swab	Live	KRISP, KZN Research Innovation and Sequencing Platform	Giandhari J, Pillay S, Lessells R, Mdlalose K, York D, Khan S, Tegally H, Wilkinson E, de Oliveira T
141	South Africa	Zululand	SZu	EPI_ISL_529796	29847	Unknown	Oro-pharyngeal swab	Live	KRISP, KZN Research Innovation and Sequencing Platform	Giandhari J, Pillay S, Lessells R, Mdlalose K, York D, Khan S, Tegally H, Wilkinson E, de Oliveira T
142	South Africa	Zululand	SZu	EPI_ISL_529755	29844	Unknown	Oro-pharyngeal swab	Live	KRISP, KZN Research Innovation and Sequencing Platform	Giandhari J, Pillay S, Lessells R, Mdlalose K, York D, Khan S, Tegally H, Wilkinson E, de Oliveira T
143	South Africa	Zululand	SZu	EPI_ISL_515876	29829	Unknown	Oro-pharyngeal swab	Live	KRISP, KZN Research Innovation and Sequencing Platform	Giandhari J, Pillay S, Lessells R, Mdlalose K, York D, Khan S, Tegally H, Wilkinson E, de Oliveira T
144	South Africa	Zululand	SZu	EPI_ISL_515792	29828	Unknown	Oro-pharyngeal swab	Live	KRISP, KZN Research Innovation and Sequencing Platform	Giandhari J, Pillay S, Lessells R, Mdlalose K, York D, Khan S, Tegally H, Wilkinson E, de Oliveira T
145	Tunisia	Bizerte	TBi	EPI_ISL_458285	29611	Unknown	nasal swab	unknown	Bundeswehr Institute of Microbiology	Handrick,S., Bestehorn-Willmann,M.S., Eckstein,S., Walter,M.C., Antwerpen,M.H., Rehn,A., Naija,H., Stoecker,K., Woelfel,R. and Ben Moussa,M.

## Sheet: FEMALE
Real Time Viral Sub-Strains Discovery in Emerging Infectious Disease Situation – The African Perspective
Moses Ekpenyong1*, Mercy Edoho1, Udoinyang Inyang1, Faith-Michael Uzoka2, Ifiok Udo1, Nseobong Uto3, Itemobong Ekaidem4, Anietie Moses4, Enoabasi Anwana5, Youchou Tatfeng6, Geoffery Joseph1, Emmanuel Dan1, Juliana Ndunagu7
1Department of Computer Science, University of Uyo, Nigeria
2Department of Mathematics and Computing, Mount Royal University, Canada
3School of Mathematics and Statistics, University of Saint Andrews, United Kingdom
4College of Health Sciences, University of Uyo, Nigeria
5Department of Botany and Ecological Studies, University of Uyo, Nigeria
6College of Health Sciences, Niger Delta University, Nigeria
7Department of Computer Science, National Open University, Nigeria
* – Corresponding Author
SupplData1_1.xlsx: Metadata on extracted genome sequence
S/no.	Country	State	Abbreviation	Accession No.	Length	Travelling history	Specimen source	Status	Submitting Lab	Authors
1	Algeria	Blida	ABl	EPI_ISL_418241	29730	unknown	unknown	Hospitalized	National Reference Center for Viruses of Respiratory Infections, Institut Pasteur, Paris	Mélanie Albert, Marion Barbet, Sylvie Behillil, Méline Bizard, Angela Brisebarre, Flora Donati, Etienne Simon-Lorière, Vincent Enouf, Maud Vanpeene, Sylvie van der Werf, Fawzi Derrar
2	Benin	Cotonou	BCo	EPI_ISL_476834	29620	Travel from France	unknown	unknown	Charité-Universitätsmedizin Berlin	Yadouleton, Anges; Sander Anna-Lena; Moreira-Soto Andres; Drexler, Jan Felix
3	Benin	Cotonou	BCo	EPI_ISL_476833	29804	Travel from France	Oro-pharyngeal swab	unknown	Charité-Universitätsmedizin Berlin	Yadouleton, Anges; Sander Anna-Lena; Moreira-Soto Andres; Drexler, Jan Felix
4	Benin	Cotonou	BCo	EPI_ISL_476829	29804	traveler from Burkina Faso	Oro-pharyngeal swab	unknown	Charité-Universitätsmedizin Berlin	Yadouleton, Anges; Sander Anna-Lena; Moreira-Soto Andres; Drexler, Jan Felix
5	Benin	Cotonou	BCo	EPI_ISL_476826	29799	travel to Togo	Oro-pharyngeal swab	unknown	Charité-Universitätsmedizin Berlin	Yadouleton, Anges; Sander Anna-Lena; Moreira-Soto Andres; Drexler, Jan Felix
6	DRC	Haut Katanga	DHa	EPI_ISL_471412	29813	unknown	unknown	unknown	Pathogen Sequencing Lab, National Institute for Biomedical Research (INRB)	Placide Mbala-Kingebeni, Edith Nkwembe, Eddy Kinganda-Lusamaki, Amuri Aziza, Francisca Muyembe Mawete, Emmanuel Lokilo Lofiko, Catherine Pratt, Matthias Pauthner, Josh Quick, Allison Black, James Hadfield, Trevor Bedford, Ian Goodfellow, Andrew Rambaut, N
7	DRC	Kinshasha	DKi	EPI_ISL_527568	29616	unknown	unknown	unknown	Pathogen Sequencing Lab, National Institute for Biomedical Research (INRB)	Placide Mbala-Kingebeni, Edith Nkwembe, Eddy Kinganda-Lusamaki, Amuri Aziza, Francisca Muyembe Mawete, Emmanuel Lokilo Lofiko, Catherine Pratt, Matthias Pauthner, Josh Quick, Allison Black, James Hadfield, Trevor Bedford, Ian Goodfellow, Andrew Rambaut, Nick Loman, Kristian Andersen, Michael Wiley, Steve Ahuka-Mundeke, Jean-Jacques Muyembe Tamfum
8	DRC	Kinshasha	DKi	EPI_ISL_527564	29636	unknown	unknown	unknown	Pathogen Sequencing Lab, National Institute for Biomedical Research (INRB)	Placide Mbala-Kingebeni, Edith Nkwembe, Eddy Kinganda-Lusamaki, Amuri Aziza, Francisca Muyembe Mawete, Emmanuel Lokilo Lofiko, Catherine Pratt, Matthias Pauthner, Josh Quick, Allison Black, James Hadfield, Trevor Bedford, Ian Goodfellow, Andrew Rambaut, N
9	DRC	Kinshasha	DKi	EPI_ISL_527563	29674	unknown	unknown	unknown	Pathogen Sequencing Lab, National Institute for Biomedical Research (INRB)	Placide Mbala-Kingebeni, Edith Nkwembe, Eddy Kinganda-Lusamaki, Amuri Aziza, Francisca Muyembe Mawete, Emmanuel Lokilo Lofiko, Catherine Pratt, Matthias Pauthner, Josh Quick, Allison Black, James Hadfield, Trevor Bedford, Ian Goodfellow, Andrew Rambaut, N
10	DRC	Kinshasha	DKi	EPI_ISL_527560	29761	unknown	unknown	unknown	Pathogen Sequencing Lab, National Institute for Biomedical Research (INRB)	Placide Mbala-Kingebeni, Edith Nkwembe, Eddy Kinganda-Lusamaki, Amuri Aziza, Francisca Muyembe Mawete, Emmanuel Lokilo Lofiko, Catherine Pratt, Matthias Pauthner, Josh Quick, Allison Black, James Hadfield, Trevor Bedford, Ian Goodfellow, Andrew Rambaut, N
11	DRC	Kongo Central	DKC	EPI_ISL_527557	29647	unknown	unknown	unknown	Pathogen Sequencing Lab, National Institute for Biomedical Research (INRB)	Placide Mbala-Kingebeni, Edith Nkwembe, Eddy Kinganda-Lusamaki, Amuri Aziza, Francisca Muyembe Mawete, Emmanuel Lokilo Lofiko, Catherine Pratt, Matthias Pauthner, Josh Quick, Allison Black, James Hadfield, Trevor Bedford, Ian Goodfellow, Andrew Rambaut, N
12	DRC	Kongo Central	DKC	EPI_ISL_527543	29623	unknown	unknown	unknown	Pathogen Sequencing Lab, National Institute for Biomedical Research (INRB)	Placide Mbala-Kingebeni, Edith Nkwembe, Eddy Kinganda-Lusamaki, Amuri Aziza, Francisca Muyembe Mawete, Emmanuel Lokilo Lofiko, Catherine Pratt, Matthias Pauthner, Josh Quick, Allison Black, James Hadfield, Trevor Bedford, Ian Goodfellow, Andrew Rambaut, N
13	DRC	Kongo Central	DKC	EPI_ISL_527538	29517	unknown	unknown	unknown	Pathogen Sequencing Lab, National Institute for Biomedical Research (INRB)	Placide Mbala-Kingebeni, Edith Nkwembe, Eddy Kinganda-Lusamaki, Amuri Aziza, Francisca Muyembe Mawete, Emmanuel Lokilo Lofiko, Catherine Pratt, Matthias Pauthner, Josh Quick, Allison Black, James Hadfield, Trevor Bedford, Ian Goodfellow, Andrew Rambaut, N
14	DRC	Kongo Central	DKC	EPI_ISL_527523	29623	unknown	unknown	unknown	Pathogen Sequencing Lab, National Institute for Biomedical Research (INRB)	Placide Mbala-Kingebeni, Edith Nkwembe, Eddy Kinganda-Lusamaki, Amuri Aziza, Francisca Muyembe Mawete, Emmanuel Lokilo Lofiko, Catherine Pratt, Matthias Pauthner, Josh Quick, Allison Black, James Hadfield, Trevor Bedford, Ian Goodfellow, Andrew Rambaut, N
15	DRC	Sud Kivu	DSK	EPI_ISL_527548	29645	unknown	unknown	unknown	Pathogen Sequencing Lab, National Institute for Biomedical Research (INRB)	Placide Mbala-Kingebeni, Edith Nkwembe, Eddy Kinganda-Lusamaki, Amuri Aziza, Francisca Muyembe Mawete, Emmanuel Lokilo Lofiko, Catherine Pratt, Matthias Pauthner, Josh Quick, Allison Black, James Hadfield, Trevor Bedford, Ian Goodfellow, Andrew Rambaut, N
16	DRC	Sud Kivu	DSK	EPI_ISL_527532	29642	unknown	unknown	unknown	Pathogen Sequencing Lab, National Institute for Biomedical Research (INRB)	Placide Mbala-Kingebeni, Edith Nkwembe, Eddy Kinganda-Lusamaki, Amuri Aziza, Francisca Muyembe Mawete, Emmanuel Lokilo Lofiko, Catherine Pratt, Matthias Pauthner, Josh Quick, Allison Black, James Hadfield, Trevor Bedford, Ian Goodfellow, Andrew Rambaut, N
17	DRC	Sud Kivu	DSK	EPI_ISL_527524	29593	unknown	unknown	unknown	Pathogen Sequencing Lab, National Institute for Biomedical Research (INRB)	Placide Mbala-Kingebeni, Edith Nkwembe, Eddy Kinganda-Lusamaki, Amuri Aziza, Francisca Muyembe Mawete, Emmanuel Lokilo Lofiko, Catherine Pratt, Matthias Pauthner, Josh Quick, Allison Black, James Hadfield, Trevor Bedford, Ian Goodfellow, Andrew Rambaut, N
18	DRC	Sud Kivu	DSK	EPI_ISL_527494	29797	unknown	unknown	unknown	Pathogen Sequencing Lab, National Institute for Biomedical Research (INRB)	Placide Mbala-Kingebeni, Edith Nkwembe, Eddy Kinganda-Lusamaki, Amuri Aziza, Francisca Muyembe Mawete, Emmanuel Lokilo Lofiko, Catherine Pratt, Matthias Pauthner, Josh Quick, Allison Black, James Hadfield, Trevor Bedford, Ian Goodfellow, Andrew Rambaut, N
19	Egypt	Cairo	ECa	EPI_ISL_529032	29792	unknown	Nasophanryngeal swab	released	Next Generation Sequencing Reference Laboratory, Faculty of Medicine, CAIRO UNIVERSITY and The Center for Genome and Microbiome Research, Faculty of Pharmacy, CAIRO UNIVERSITY	May Sherif Soliman, May Abdelfattah, Ramy Karam Aziz
20	Egypt	Cairo	ECa	EPI_ISL_469275	29760	unknown	Nasophanryngeal swab	Alive	Human Genome Center	Zekri, Abdel Rahman N, Amer,K.E., Ahmed,O.S., Soliman,H.K., Hafez,M.M., Bahnassy,A.A., Abdelhamid,W., Gad,A., Ali,M., Hassan,W., Samir,M., Raouf,A., Hamdy,M.S., Soliman,M.S., Elsissy,M.H., Elkhateeb,S.M., Ezzelarab,M.H., Abouelhoda, Mohamed
21	Egypt	Cairo	ECa	EPI_ISL_482775	29814	Unknown	unknown	Alive	Medical Ain Shams Research Institute (MASRI), Ain Shams University	Hesham Elghazaly, Sara Hassan Agwa, Ahmad Moustafa, Hala Hafez, Sara Elnakeep, Shaimaa Moustafa, Aya Mohamed, Reham Mamdouh, Ghada Ismael, Ashraf Omar, Osama Mansour, Mahmoud Elmeitini
22	Egypt	Cairo	ECa	EPI_ISL_482773	29780	unknown	unknown	Alive	Medical Ain Shams Research Institute (MASRI), Ain Shams University	Hesham Elghazaly, Sara Hassan Agwa, Ahmad Moustafa, Hala Hafez, Sara Elnakeep, Shaimaa Moustafa, Aya Mohamed, Reham Mamdouh, Ghada Ismael, Ashraf Omar, Osama Mansour, Mahmoud Elmeitini
23	Gambia	Kombo	GKo	EPI_ISL_471160	29782	unknown	unknown	released	MRCG at LSHTM Genomics lab	Sesay et al
24	Gambia	Kombo	GKo	EPI_ISL_471163	29782	unknown	unknown	released	MRCG at LSHTM Genomics lab	Sesay et al
25	Gambia	Kombo	GKo	EPI_ISL_471165	29782	unknown	unknown	unknown	MRCG at LSHTM Genomics lab	Sesay et al
26	Gambia	West Coast Region	GWC	EPI_ISL_428855	29782	unknown	Oro-pharyngeal swab	released	MRCG at LSHTM Genomics lab	Sesay et al
27	Ghana	Greater Ghana	GhG	EPI_ISL_422405	29810	unknown	Oro-nasopharyngeal swab	unknown	WACCBIP, University of Ghana	Joyce M. Ngoi, Bright Adu, Collins M. Morang’a, Selassie Kumordjie, Miriam Eshun, Linda Boatemaa, Vanessa Magnussen, Erasmus Kotey, Fred Tei-Maya, Dominic S. Y. Amuzu, Peter Quashie, Augustina Arjarquah, Ivy Asante, Evelyn Bonney, George B. Kyei, Kofi Bonney, Abraham Kwabena Anang, Gordon A. Awandare, William Ampofo
28	Ghana	Greater Ghana	GhG	EPI_ISL_422403	29810	unknown	Oro-nasopharyngeal swab	unknown	WACCBIP, University of Ghana	Joyce M. Ngoi, Bright Adu, Collins M. Morang’a, Selassie Kumordjie, Miriam Eshun, Linda Boatemaa, Vanessa Magnussen, Erasmus Kotey, Fred Tei-Maya, Dominic S. Y. Amuzu, Peter Quashie, Augustina Arjarquah, Ivy Asante, Evelyn Bonney, George B. Kyei, Kofi Bon
29	Ghana	Greater Ghana	GhG	EPI_ISL_422402	29810	unknown	Oro-nasopharyngeal swab	unknown	WACCBIP, University of Ghana	Joyce M. Ngoi, Bright Adu, Collins M. Morang’a, Selassie Kumordjie, Miriam Eshun, Linda Boatemaa, Vanessa Magnussen, Erasmus Kotey, Fred Tei-Maya, Dominic S. Y. Amuzu, Peter Quashie, Augustina Arjarquah, Ivy Asante, Evelyn Bonney, George B. Kyei, Kofi Bon
30	Ghana	Greater Ghana	GhG	EPI_ISL_422398	29810	unknown	Oro-nasopharyngeal swab	unknown	WACCBIP, University of Ghana	Joyce M. Ngoi, Bright Adu, Collins M. Morang’a, Selassie Kumordjie, Miriam Eshun, Linda Boatemaa, Vanessa Magnussen, Erasmus Kotey, Fred Tei-Maya, Dominic S. Y. Amuzu, Peter Quashie, Augustina Arjarquah, Ivy Asante, Evelyn Bonney, George B. Kyei, Kofi Bon
31	Kenya	Unknown	KEN	EPI_ISL_457935	29014	unknown	unknown	unknown	KEMRI-Wellcome Trust Research Programme/KEMRI-CGMR-C Kilifi	Githinji G. et al 2020
32	Kenya	Unknown	KEN	EPI_ISL_457882	29014	unknown	unknown	unknown	KEMRI-Wellcome Trust Research Programme/KEMRI-CGMR-C Kilifi	Githinji G. et al 2020
33	Kenya	Unknown	KEN	EPI_ISL_457879	29782	unknown	unknown	unknown	KEMRI-Wellcome Trust Research Programme/KEMRI-CGMR-C Kilifi	Githinji G. et al 2020
34	Kenya	Unknown	KEN	EPI_ISL_457854	29782	unknown	unknown	unknown	KEMRI-Wellcome Trust Research Programme/KEMRI-CGMR-C Kilifi	Githinji G. et al 2020
35	Madagascar	Antananarivo	MgA	EPI_ISL_508862	29863	Patient infected while traveling in France	Nasophanryngeal and oropharyngeal swabs	released	Virology Unit, Institut Pasteur de Madagascar	Christian Ranaivoson, Cara Brook, Norosoa Razanajatovo, Vida Ahyong, Tsiry Randriambolamanantsoa, Michelle Tan, Vololoniaina Raharinosy, Helisoa Razafimanjato, Cristina M. Tato, Joseph L. DeRisi, Soa Fy Andriamandimby, Jean-Michel Heraud
36	Madagascar	Fenoarivo	MgF	EPI_ISL_508863	29863	Patient infected while traveling in France	Nasophanryngeal and oropharyngeal swabs	released	Virology Unit, Institut Pasteur de Madagascar	Christian Ranaivoson, Cara Brook, Norosoa Razanajatovo, Vida Ahyong, Tsiry Randriambolamanantsoa, Michelle Tan, Vololoniaina Raharinosy, Helisoa Razafimanjato, Cristina M. Tato, Joseph L. DeRisi, Soa Fy Andriamandimby, Jean-Michel Heraud
37	Mali	Bamako	MlB	EPI_ISL_487465	29821	unknown	Oro-pharyngeal swab	unknown	Bundeswehr Institut of Microbiology	Kouriba, Dürr, Sangaré, Rehn, Traoré, Bestehorn-Willmann, Walter, Quedraogo, Zimmermann, Maiga, Heitzer, Sogodogo, Antwerpen, Wölfel
38	Mali	Bamako	MlB	EPI_ISL_487457	29783	unknown	Oro-pharyngeal swab	unknown	Bundeswehr Institut of Microbiology	Kouriba, Dürr, Sangaré, Rehn, Traoré, Bestehorn-Willmann, Walter, Quedraogo, Zimmermann, Maiga, Heitzer, Sogodogo, Antwerpen, Wölfel
39	Mali	Bamako	MlB	EPI_ISL_487455	29782	unknown	Oro-pharyngeal swab	unknown	Bundeswehr Institut of Microbiology	Kouriba, Dürr, Sangaré, Rehn, Traoré, Bestehorn-Willmann, Walter, Quedraogo, Zimmermann, Maiga, Heitzer, Sogodogo, Antwerpen, Wölfel
40	Mali	Bamako	MlB	EPI_ISL_487454	29773	unknown	Oro-pharyngeal swab	unknown	Bundeswehr Institut of Microbiology	Kouriba, Dürr, Sangaré, Rehn, Traoré, Bestehorn-Willmann, Walter, Quedraogo, Zimmermann, Maiga, Heitzer, Sogodogo, Antwerpen, Wölfel
41	Morocco	Rabat	MoR	EPI_ISL_482739	29782	unknown	Nasopharyngeal swab	unknown	Medical Biotechnology Laboratory, Rabat Medical and Pharmacy School, Mohammed The Vth University in Rabat	Meriem LAAMARTI, Souad KARTTI, Rokia LAAMARTI , M.W. CHEMAO-ELFIHRI, Loubna ALLAM, Mouna OUADGHIRI, Imane SMYEJ, Jalila RAHOUI, Houda BENRAHMA, Jalil El ATAR, Idrissa DIAWARA, Rachid EL JAOUDI, Laila SBABOU, Chakib NEJJARI, Saaid AMZAZI, Rachid MENTAG, Lahcen BELYAMANI and Azeddine IBRAHIMI
42	Morocco	Rabat	MoR	EPI_ISL_482735	29782	unknown	Nasopharyngeal swab	unknown	Medical Biotechnology Laboratory, Rabat Medical and Pharmacy School, Mohammed The Vth University in Rabat	Meriem LAAMARTI, Souad KARTTI, Rokia LAAMARTI , M.W. CHEMAO-ELFIHRI, Loubna ALLAM, Mouna OUADGHIRI, Imane SMYEJ, Jalila RAHOUI, Houda BENRAHMA, Jalil El ATAR, Idrissa DIAWARA, Rachid EL JAOUDI, Laila SBABOU, Chakib NEJJARI, Saaid AMZAZI, Rachid MENTAG, Lahcen BELYAMANI and Azeddine IBRAHIMI
43	Nigeria	Ekiti	NEk	EPI_ISL_487108	29900	unknown	Nasal swab	unknown	African Centre of Excellence for Genomics of Infectious Diseases (ACEGID), Redeemer's University, Ede, Osun State, Nigeria	Oluniyi P.E., Ajogbasile F.V., Kayode A., Oguzie J., Olawoye I., Uwanibe J., Olumade T., Folarin O.A., Ihekweazu C., Happi C.T.
44	Nigeria	Ekiti	NEk	EPI_ISL_487097	29783	unknown	Nasopharyngeal swab	Hospitalized	African Centre of Excellence for Genomics of Infectious Diseases (ACEGID), Redeemer's University, Ede, Osun State, Nigeria	Oluniyi P.E., Ajogbasile F.V., Kayode A., Oguzie J., Olawoye I., Uwanibe J., Olumade T., Folarin O.A., Ihekweazu C., Happi C.T.
45	Nigeria	Ekiti	NEk	EPI_ISL_487096	29897	unknown	unknown	unknown	African Centre of Excellence for Genomics of Infectious Diseases (ACEGID), Redeemer's University, Ede, Osun State, Nigeria	Oluniyi P.E., Ajogbasile F.V., Kayode A., Oguzie J., Olawoye I., Uwanibe J., Olumade T., Folarin O.A., Ihekweazu C., Happi C.T.
46	Nigeria	Ogun	NOg	EPI_ISL_455412	29846	unknown	throat and Nasal swab	not hospitalized	African Centre of Excellence for Genomics of Infectious Diseases (ACEGID), Redeemer's University, Ede, Osun State, Nigeria	Oluniyi P.E., Ajogbasile F.V., Kayode A., Oguzie J., Olawoye I., Uwanibe J., Olumade T., Folarin O.A., Ihekweazu C., Happi C.T.
47	Nigeria	Ondo	NOn	EPI_ISL_487089	29874	unknown	unknown	unknown	African Centre of Excellence for Genomics of Infectious Diseases (ACEGID), Redeemer's University, Ede, Osun State, Nigeria	Oluniyi P.E., Ajogbasile F.V., Kayode A., Oguzie J., Olawoye I., Uwanibe J., Olumade T., Folarin O.A., Ihekweazu C., Happi C.T.
48	Nigeria	Osun	NOs	EPI_ISL_527893	29840	unknown	unknown	unknown	African Centre of Excellence for Genomics of Infectious Diseases (ACEGID), Redeemer's University, Ede, Osun State, Nigeria	Oluniyi P.E., Ajogbasile F.V., Kayode A., Oguzie J., Olawoye I., Uwanibe J., Olumade T., Folarin O.A., Ihekweazu C., Happi C.T.
49	Nigeria	Osun	NOs	EPI_ISL_487110	29879	unknown	Saliva and Nasal Swab	unknown	African Centre of Excellence for Genomics of Infectious Diseases (ACEGID), Redeemer's University, Ede, Osun State, Nigeria	Oluniyi P.E., Ajogbasile F.V., Kayode A., Oguzie J., Olawoye I., Uwanibe J., Olumade T., Folarin O.A., Ihekweazu C., Happi C.T.
50	Nigeria	Osun	NOs	EPI_ISL_455426	29858	unknown	Saliva and Nasopharngeal Swab	not hospitalized	African Centre of Excellence for Genomics of Infectious Diseases (ACEGID), Redeemer's University, Ede, Osun State, Nigeria	Oluniyi P.E., Ajogbasile F.V., Kayode A., Oguzie J., Olawoye I., Uwanibe J., Olumade T., Folarin O.A., Ihekweazu C., Happi C.T.
51	Nigeria	Osun	NOs	EPI_ISL_455424	29787	unknown	Saliva and Nasopharngeal Swab	not hospitalized	African Centre of Excellence for Genomics of Infectious Diseases (ACEGID), Redeemer's University, Ede, Osun State, Nigeria	Oluniyi P.E., Ajogbasile F.V., Kayode A., Oguzie J., Olawoye I., Uwanibe J., Olumade T., Folarin O.A., Ihekweazu C., Happi C.T.
52	Nigeria	Unknown	NGN	EPI_ISL_522549	29782	patient infected by local transmission	unknown	not hospitalized	UMR PIMIT Université de La Réunion	David Wilkinson, Camille Lebarbenchon, Patrick Mavingui
53	Nigeria	Unknown	NGN	EPI_ISL_522547	29782	patient infected while traveling in Europe	unknown	released	UMR PIMIT Université de La Réunion	David Wilkinson, Camille Lebarbenchon, Patrick Mavingui
54	Senegal	Dakar	SDa	EPI_ISL_498244	29742	Unkown	Nasopharyngeal swab	Released	Institut Pasteur de Dakar	Ndongo Dia, Moussa Moise Diagne, Mamadou Diop, Marie Henriette Dior Ndione, Mamadou Malado Jallow, Safietou Sankhe Mbengue, Ousmane Faye, Amadou Alpha Sall.
55	Senegal	Dakar	SDa	EPI_ISL_481243	29820	Unkown	Nasopharyngeal swab	Released	Institut Pasteur de Dakar	Ndongo Dia, Moussa Moise Diagne, Mamadou Diop, Marie Henriette Dior Ndione, Mamadou Malado Jallow, Safietou Sankhe Mbengue, Ousmane Faye, Amadou Alpha Sall.
56	Senegal	Dakar	SDa	EPI_ISL_476570	29792	Unkown	Nasopharyngeal swab	Released	Institut Pasteur de Dakar	Ndongo Dia, Moussa Moise Diagne, Mamadou Diop, Marie Henriette Dior Ndione, Mamadou Malado Jallow, Safietou Sankhe Mbengue, Ousmane Faye, Amadou Alpha Sall.
57	Senegal	Dakar	SDa	EPI_ISL_476148	29787	Unkown	Nasopharyngeal swab	Released	Institut Pasteur de Dakar	Ndongo Dia, Moussa Moise Diagne, Mamadou Diop, Marie Henriette Dior Ndione, Mamadou Malado Jallow, Safietou Sankhe Mbengue, Ousmane Faye, Amadou Alpha Sall.
58	Senegal	Diourbel	SDi	EPI_ISL_418214	29659	Unkown	Combined nasopharyngeal and oropharyngeal swab	Released	Institut Pasteur de Dakar	Ndongo Dia, Moussa Moise Diagne, Mamadou Diop, Marie Henriette Dior Ndione, Mamadou Malado Jallow, Safietou Sankhe Mbengue, Ousmane Faye, Amadou Alpha Sall.
59	Senegal	Diourbel	SDi	EPI_ISL_418212	29709	Unkown	Combined nasopharyngeal and oropharyngeal swab	Released	Institut Pasteur de Dakar	Ndongo Dia, Moussa Moise Diagne, Mamadou Diop, Marie Henriette Dior Ndione, Mamadou Malado Jallow, Safietou Sankhe Mbengue, Ousmane Faye, Amadou Alpha Sall.
60	Senegal	Diourbel	SDi	EPI_ISL_418211	29784	Unkown	Combined nasopharyngeal and oropharyngeal swab	Released	Institut Pasteur de Dakar	Ndongo Dia, Ousmane Faye, Amadou Alpha Sall
61	Senegal	Diourbel	SDi	EPI_ISL_418210	29828	Unkown	Combined nasopharyngeal and oropharyngeal swab	Released	Institut Pasteur de Dakar	Ndongo Dia, Ousmane Faye, Amadou Alpha Sall
62	Senegal	Thies	STh	EPI_ISL_420078	29813	Unkown	Combined nasopharyngeal and oropharyngeal swab	Released	Institut Pasteur de Dakar	Ndongo Dia, Moussa Moise Diagne, Mamadou Diop, Marie Henriette Dior Ndione, Mamadou Malado Jallow, Safietou Sankhe Mbengue, Ousmane Faye, Amadou Alpha Sall.
63	Senegal	Thies	STh	EPI_ISL_420071	29815	Unkown	Combined nasopharyngeal and oropharyngeal swab	Released	Institut Pasteur de Dakar	Ndongo Dia, Ousmane Faye, Amadou Alpha Sall
64	Senegal	Thies	STh	EPI_ISL_418217	29838	Unkown	Combined nasopharyngeal and oropharyngeal swab	Released	Institut Pasteur de Dakar	Ndongo Dia, Ousmane Faye, Amadou Alpha Sall
65	South Africa	Amajuba	SAm	EPI_ISL_529726	29821	Unkown	Oro-pharyngeal swab	Live	KRISP, KZN Research Innovation and Sequencing Platform	Giandhari J, Pillay S, Lessells R, Mdlalose K, York D, Khan S, Tegally H, Wilkinson E, de Oliveira T
66	South Africa	Amajuba	SAm	EPI_ISL_529725	29861	Unkown	Oro-pharyngeal swab	Live	KRISP, KZN Research Innovation and Sequencing Platform	Giandhari J, Pillay S, Lessells R, Mdlalose K, York D, Khan S, Tegally H, Wilkinson E, de Oliveira T
67	South Africa	Amajuba	SAm	EPI_ISL_529724	29869	Unkown	Oro-pharyngeal swab	Live	KRISP, KZN Research Innovation and Sequencing Platform	Giandhari J, Pillay S, Lessells R, Mdlalose K, York D, Khan S, Tegally H, Wilkinson E, de Oliveira T
68	South Africa	Amajuba	SAm	EPI_ISL_529722	29663	Unkown	Oro-pharyngeal swab	Live	KRISP, KZN Research Innovation and Sequencing Platform	Giandhari J, Pillay S, Lessells R, Mdlalose K, York D, Khan S, Tegally H, Wilkinson E, de Oliveira T
69	South Africa	Berea	SBe	EPI_ISL_467469	29861	Unkown	Oro-pharyngeal swab	unknown	KRISP, KZN Research Innovation and Sequencing Platform	Giandhari J, Pillay S, Lessells R, Mdlalose K, York D, Khan S, Tegally H, Wilkinson E, de Oliveira T
70	South Africa	Berea	SBe	EPI_ISL_467466	29829	Unkown	Oro-pharyngeal swab	unknown	KRISP, KZN Research Innovation and Sequencing Platform	Giandhari J, Pillay S, Lessells R, Mdlalose K, York D, Khan S, Tegally H, Wilkinson E, de Oliveira T
71	South Africa	Berea	SBe	EPI_ISL_467467	29846	Unkown	Oro-pharyngeal swab	unknown	KRISP, KZN Research Innovation and Sequencing Platform	Giandhari J, Pillay S, Lessells R, Mdlalose K, York D, Khan S, Tegally H, Wilkinson E, de Oliveira T
72	South Africa	Berea	SBe	EPI_ISL_467465	29829	Unkown	Oro-pharyngeal swab	unknown	KRISP, KZN Research Innovation and Sequencing Platform	Giandhari J, Pillay S, Lessells R, Mdlalose K, York D, Khan S, Tegally H, Wilkinson E, de Oliveira T
73	South Africa	Cape Town Metro	SCT	EPI_ISL_464158	29354	Unkown	Oro-pharyngeal swab	unknown	Division of Medical Virology, Stellenbosch University and National Health Laboratory Service (NHLS)	Susan Engelbrecht, Kayla Delaney, Bronwyn Kleinhans, Houriiyah Tegally, Eduan Wilkindon, Gert van Zyl, Wolfgang Preiser, Tulio de Oliveira
74	South Africa	Cape Town Metro	SCT	EPI_ISL_464155	29867	Unkown	Oro-pharyngeal swab	unknown	Division of Medical Virology, Stellenbosch University and National Health Laboratory Service (NHLS)	Susan Engelbrecht, Kayla Delaney, Bronwyn Kleinhans, Houriiyah Tegally, Eduan Wilkindon, Gert van Zyl, Wolfgang Preiser, Tulio de Oliveira
75	South Africa	Cape Town Metro	SCT	EPI_ISL_464154	29353	Unkown	Oro-pharyngeal swab	unknown	Division of Medical Virology, Stellenbosch University and National Health Laboratory Service (NHLS)	Susan Engelbrecht, Kayla Delaney, Bronwyn Kleinhans, Houriiyah Tegally, Eduan Wilkindon, Gert van Zyl, Wolfgang Preiser, Tulio de Oliveira
76	South Africa	Cape Town Metro	SCT	EPI_ISL_464153	29675	Unkown	Oro-pharyngeal swab	unknown	Division of Medical Virology, Stellenbosch University and National Health Laboratory Service (NHLS)	Susan Engelbrecht, Kayla Delaney, Bronwyn Kleinhans, Houriiyah Tegally, Eduan Wilkindon, Gert van Zyl, Wolfgang Preiser, Tulio de Oliveira
77	South Africa	Eastern Cape	SEC	EPI_ISL_435059	29902	unknown	Combined nasopharyngeal and oropharyngeal swab	unknown	National Influenza and other Respiratory Viruses Centre-Tunisia, Virology Unit, Microbiology Laboratory, Charles Nicolle Hospital	Allam M, Ismail A, Khumalo Z, Kwenda S, Mtshali P, Mnyameni F, Mohale T, Subramoney K, Bhiman JN
78	South Africa	eThekwini	SeT	EPI_ISL_529732	29838	Unkown	Oro-pharyngeal swab	Live	KRISP, KZN Research Innovation and Sequencing Platform	Giandhari J, Pillay S, Lessells R, Mdlalose K, York D, Khan S, Tegally H, Wilkinson E, de Oliveira T
79	South Africa	eThekwini	SeT	EPI_ISL_518053	29798	Unkown	Oro-pharyngeal swab	Live	KRISP, KZN Research Innovation and Sequencing Platform	Giandhari J, Pillay S, Lessells R, Mdlalose K, York D, Khan S, Tegally H, Wilkinson E, de Oliveira T
80	South Africa	eThekwini	SeT	EPI_ISL_518052	29860	Unkown	Oro-pharyngeal swab	Live	KRISP, KZN Research Innovation and Sequencing Platform	Giandhari J, Pillay S, Lessells R, Mdlalose K, York D, Khan S, Tegally H, Wilkinson E, de Oliveira T
81	South Africa	eThekwini	SeT	EPI_ISL_518051	29861	Unkown	Oro-pharyngeal swab	Live	KRISP, KZN Research Innovation and Sequencing Platform	Giandhari J, Pillay S, Lessells R, Mdlalose K, York D, Khan S, Tegally H, Wilkinson E, de Oliveira T
82	South Africa	Free State	SFS	EPI_ISL_490307	29868	unknown	Combined nasopharyngeal and oropharyngeal swab	unknown	National Influenza and other Respiratory Viruses Centre-Tunisia, Virology Unit, Microbiology Laboratory, Charles Nicolle Hospital
83	South Africa	Free State	SFS	EPI_ISL_490301	29869	unknown	Combined nasopharyngeal and oropharyngeal swab	unknown	National Influenza and other Respiratory Viruses Centre-Tunisia, Virology Unit, Microbiology Laboratory, Charles Nicolle Hospital
84	South Africa	Free State	SFS	EPI_ISL_490310	29899	unknown	Combined nasopharyngeal and oropharyngeal swab	unknown	National Influenza and other Respiratory Viruses Centre-Tunisia, Virology Unit, Microbiology Laboratory, Charles Nicolle Hospital	Allam M, Ismail A, Khumalo Z, Kwenda S, Mtshali P, Mnyameni F, Mohale T, Subramoney K, Bhiman JN
85	South Africa	Free State	SFS	EPI_ISL_490294	29868	unknown	Combined nasopharyngeal and oropharyngeal swab	unknown	National Influenza and other Respiratory Viruses Centre-Tunisia, Virology Unit, Microbiology Laboratory, Charles Nicolle Hospital	Allam M, Ismail A, Khumalo Z, Kwenda S, Mtshali P, Mnyameni F, Mohale T, Subramoney K, Bhiman JN
86	South Africa	Harry Gwala	SHG	EPI_ISL_515833	29850	Unknown	Oro-pharyngeal swab	unknown	KRISP, KZN Research Innovation and Sequencing Platform	Giandhari J, Pillay S, Lessells R, Mdlalose K, York D, Khan S, Tegally H, Wilkinson E, de Oliveira T
87	South Africa	Harry Gwala	SHG	EPI_ISL_515797	29857	Unkown	Oro-pharyngeal swab	unknown	KRISP, KZN Research Innovation and Sequencing Platform	Giandhari J, Pillay S, Lessells R, Mdlalose K, York D, Khan S, Tegally H, Wilkinson E, de Oliveira T
88	South Africa	Harry Gwala	SHG	EPI_ISL_515794	29819	Unknown	Oro-pharyngeal swab	unknown	KRISP, KZN Research Innovation and Sequencing Platform	Giandhari J, Pillay S, Lessells R, Mdlalose K, York D, Khan S, Tegally H, Wilkinson E, de Oliveira T
89	South Africa	Harry Gwala	SHG	EPI_ISL_515788	29816	Unknown	Oro-pharyngeal swab	unknown	KRISP, KZN Research Innovation and Sequencing Platform	Giandhari J, Pillay S, Lessells R, Mdlalose K, York D, Khan S, Tegally H, Wilkinson E, de Oliveira T
90	South Africa	Ilembe	SIl	EPI_ISL_529803	26816	Unknown	Oro-pharyngeal swab	Live	KRISP, KZN Research Innovation and Sequencing Platform	Giandhari J, Pillay S, Lessells R, Mdlalose K, York D, Khan S, Tegally H, Wilkinson E, de Oliveira T
91	South Africa	Ilembe	SIl	EPI_ISL_529795	29834	Unkown	Oro-pharyngeal swab	Live	KRISP, KZN Research Innovation and Sequencing Platform	Giandhari J, Pillay S, Lessells R, Mdlalose K, York D, Khan S, Tegally H, Wilkinson E, de Oliveira T
92	South Africa	Ilembe	SIl	EPI_ISL_529793	29815	Unknown	Oro-pharyngeal swab	Live	KRISP, KZN Research Innovation and Sequencing Platform	Giandhari J, Pillay S, Lessells R, Mdlalose K, York D, Khan S, Tegally H, Wilkinson E, de Oliveira T
93	South Africa	Ilembe	SIl	EPI_ISL_529792	29846	Unkown	Oro-pharyngeal swab	Live	KRISP, KZN Research Innovation and Sequencing Platform	Giandhari J, Pillay S, Lessells R, Mdlalose K, York D, Khan S, Tegally H, Wilkinson E, de Oliveira T
94	South Africa	King Cetshwayo	SKC	EPI_ISL_529777	29822	Unkown	Oro-pharyngeal swab	Live	KRISP, KZN Research Innovation and Sequencing Platform	Giandhari J, Pillay S, Lessells R, Mdlalose K, York D, Khan S, Tegally H, Wilkinson E, de Oliveira T
95	South Africa	King Cetshwayo	SKC	EPI_ISL_529739	29857	Unkown	Oro-pharyngeal swab	Live	KRISP, KZN Research Innovation and Sequencing Platform	Giandhari J, Pillay S, Lessells R, Mdlalose K, York D, Khan S, Tegally H, Wilkinson E, de Oliveira T
96	South Africa	King Cetshwayo	SKC	EPI_ISL_529721	29819	Unkown	Oro-pharyngeal swab	Live	KRISP, KZN Research Innovation and Sequencing Platform	Giandhari J, Pillay S, Lessells R, Mdlalose K, York D, Khan S, Tegally H, Wilkinson E, de Oliveira T
97	South Africa	King Cetshwayo	SKC	EPI_ISL_515768	29819	Unkown	Oro-pharyngeal swab	Live	KRISP, KZN Research Innovation and Sequencing Platform	Giandhari J, Pillay S, Lessells R, Mdlalose K, York D, Khan S, Tegally H, Wilkinson E, de Oliveira T
98	South Africa	Kwazulu Natal	SKz	EPI_ISL_535486	29819	King Cetshwayo	Oro-pharyngeal swab	Live	KRISP, KZN Research Innovation and Sequencing Platform	Giandhari J, Pillay S, Lessells R, Mdlalose K, York D, Khan S, Tegally H, Wilkinson E, de Oliveira T
99	South Africa	Kwazulu Natal	SKz	EPI_ISL_535483	29859	iLembe	Oro-pharyngeal swab	Live	KRISP, KZN Research Innovation and Sequencing Platform	Giandhari J, Pillay S, Lessells R, Mdlalose K, York D, Khan S, Tegally H, Wilkinson E, de Oliveira T
100	South Africa	Kwazulu Natal	SKz	EPI_ISL_535482	29821	Ugu	Oro-pharyngeal swab	Live	KRISP, KZN Research Innovation and Sequencing Platform	Giandhari J, Pillay S, Lessells R, Mdlalose K, York D, Khan S, Tegally H, Wilkinson E, de Oliveira T
101	South Africa	Kwazulu Natal	SKz	EPI_ISL_535481	29858	Ugu	Oro-pharyngeal swab	Live	KRISP, KZN Research Innovation and Sequencing Platform	Giandhari J, Pillay S, Lessells R, Mdlalose K, York D, Khan S, Tegally H, Wilkinson E, de Oliveira T
102	South Africa	LP	SLP	EPI_ISL_450300	29837	Unkown	Combined nasopharyngeal and oropharyngeal swab	Live	National Institute for Communicable Diseases of the National Health Laboratory Service	Allam M, Ismail A, Khumalo Z, Kwenda S, van Heusden P, Mtshali P, Mnyameni F, Mohale T, Subramoney K, Bhiman JN
103	South Africa	Mmorningside	SMm	EPI_ISL_467443	29863	Unkown	Oro-pharyngeal swab	Live	KRISP, KZN Research Innovation and Sequencing Platform	Giandhari J, Pillay S, Lessells R, Mdlalose K, York D, Khan S, Tegally H, Wilkinson E, de Oliveira T
104	South Africa	Mmorningside	SMm	EPI_ISL_467441	29860	Unkown	Oro-pharyngeal swab	Live	KRISP, KZN Research Innovation and Sequencing Platform	Giandhari J, Pillay S, Lessells R, Mdlalose K, York D, Khan S, Tegally H, Wilkinson E, de Oliveira T
105	South Africa	North West	SNW	EPI_ISL_504244	29888	Unkown	Nasopharyngeal swab	unknown	National Institute for Communicable Diseases of the National Health Laboratory Service	Allam M, Ismail A, Khumalo Z, Kwenda S, van Heusden P, Mtshali P, Mnyameni F, Mohale T, Subramoney K, Bhiman JN
106	South Africa	North West	SNW	EPI_ISL_504242	29865	Unkown	Nasopharyngeal swab	unknown	National Institute for Communicable Diseases of the National Health Laboratory Service	Allam M, Ismail A, Khumalo Z, Kwenda S, van Heusden P, Mtshali P, Mnyameni F, Mohale T, Subramoney K, Bhiman JN
107	South Africa	North West	SNW	EPI_ISL_504241	29890	Unkown	Nasopharyngeal swab	unknown	National Institute for Communicable Diseases of the National Health Laboratory Service	Allam M, Ismail A, Khumalo Z, Kwenda S, van Heusden P, Mtshali P, Mnyameni F, Mohale T, Subramoney K, Bhiman JN
108	South Africa	North West	SNW	EPI_ISL_504240	29864	Unkown	Nasopharyngeal swab	unknown	Division of Medical Virology, Stellenbosch University and National Health Laboratory Service (NHLS)	Susan Engelbrecht, Kayla Delaney, Bronwyn Kleinhans, Houriiyah Tegally, Eduan Wilkindon, Gert van Zyl, Wolfgang Preiser, Tulio de Oliveira
109	South Africa	Overport	SOv	EPI_ISL_467431	29837	Unkown	Oro-pharyngeal swab	Live	KRISP, KZN Research Innovation and Sequencing Platform	Giandhari J, Pillay S, Lessells R, Mdlalose K, York D, Khan S, Tegally H, Wilkinson E, de Oliveira T
110	South Africa	Sisonke	SSi	EPI_ISL_498113	29826	Unkown	Oro-pharyngeal swab	Live	KRISP, KZN Research Innovation and Sequencing Platform	Giandhari J, Pillay S, Lessells R, Mdlalose K, York D, Khan S, Tegally H, Wilkinson E, de Oliveira T
111	South Africa	Sisonke	SSi	EPI_ISL_495517	29826	Unkown	Oro-pharyngeal swab	Live	KRISP, KZN Research Innovation and Sequencing Platform	Giandhari J, Pillay S, Lessells R, Mdlalose K, York D, Khan S, Tegally H, Wilkinson E, de Oliveira T
112	South Africa	Stanger	SSt	EPI_ISL_467492	29648	Unkown	Oro-pharyngeal swab	unknown	KRISP, KZN Research Innovation and Sequencing Platform	Giandhari J, Pillay S, Lessells R, Mdlalose K, York D, Khan S, Tegally H, Wilkinson E, de Oliveira T
113	South Africa	Ugu	SUg	EPI_ISL_495521	29820	Unkown	Oro-pharyngeal swab	Live	KRISP, KZN Research Innovation and Sequencing Platform	Giandhari J, Pillay S, Lessells R, Mdlalose K, York D, Khan S, Tegally H, Wilkinson E, de Oliveira T
114	South Africa	Ugu	SUg	EPI_ISL_529747	29872	Unkown	Oro-pharyngeal swab	Live	KRISP, KZN Research Innovation and Sequencing Platform	Giandhari J, Pillay S, Lessells R, Mdlalose K, York D, Khan S, Tegally H, Wilkinson E, de Oliveira T
115	South Africa	Ugu	SUg	EPI_ISL_529743	29825	Unkown	Oro-pharyngeal swab	Live	KRISP, KZN Research Innovation and Sequencing Platform	Giandhari J, Pillay S, Lessells R, Mdlalose K, York D, Khan S, Tegally H, Wilkinson E, de Oliveira T
116	South Africa	Ugu	SUg	EPI_ISL_498054	29832	Unkown	Oro-pharyngeal swab	Live	KRISP, KZN Research Innovation and Sequencing Platform	Giandhari J, Pillay S, Lessells R, Mdlalose K, York D, Khan S, Tegally H, Wilkinson E, de Oliveira T
117	South Africa	Umbilo	SUm	EPI_ISL_482850	29801	Unkown	Oro-pharyngeal swab	Live	KRISP, KZN Research Innovation and Sequencing Platform	Giandhari J, Pillay S, Lessells R, Mdlalose K, York D, Khan S, Tegally H, Wilkinson E, de Oliveira T
118	South Africa	Umbilo	SUm	EPI_ISL_482848	29853	Unkown	Oro-pharyngeal swab	Live	KRISP, KZN Research Innovation and Sequencing Platform	Giandhari J, Pillay S, Lessells R, Mdlalose K, York D, Khan S, Tegally H, Wilkinson E, de Oliveira T
119	South Africa	Umbilo	SUm	EPI_ISL_467523	29821	Unkown	Oro-pharyngeal swab	unknown	KRISP, KZN Research Innovation and Sequencing Platform	Giandhari J, Pillay S, Lessells R, Mdlalose K, York D, Khan S, Tegally H, Wilkinson E, de Oliveira T
120	South Africa	Umbilo	SUm	EPI_ISL_467517	29855	Unkown	Oro-pharyngeal swab	unknown	KRISP, KZN Research Innovation and Sequencing Platform	Giandhari J, Pillay S, Lessells R, Mdlalose K, York D, Khan S, Tegally H, Wilkinson E, de Oliveira T
121	South Africa	Umgungundlovu	SUmg	EPI_ISL_515874	29852	Unkown	Oro-pharyngeal swab	unknown	KRISP, KZN Research Innovation and Sequencing Platform	Giandhari J, Pillay S, Lessells R, Mdlalose K, York D, Khan S, Tegally H, Wilkinson E, de Oliveira T
122	South Africa	Umgungundlovu	SUmg	EPI_ISL_515872	29854	Unkown	Oro-pharyngeal swab	Live	KRISP, KZN Research Innovation and Sequencing Platform	Giandhari J, Pillay S, Lessells R, Mdlalose K, York D, Khan S, Tegally H, Wilkinson E, de Oliveira T
123	South Africa	Umgungundlovu	SUmg	EPI_ISL_515838	29862	Unkown	Oro-pharyngeal swab	Live	KRISP, KZN Research Innovation and Sequencing Platform	Giandhari J, Pillay S, Lessells R, Mdlalose K, York D, Khan S, Tegally H, Wilkinson E, de Oliveira T
124	South Africa	Umgungundlovu	SUmg	EPI_ISL_515837	29387	Unkown	Oro-pharyngeal swab	Live	KRISP, KZN Research Innovation and Sequencing Platform	Giandhari J, Pillay S, Lessells R, Mdlalose K, York D, Khan S, Tegally H, Wilkinson E, de Oliveira T
125	South Africa	Umkhanyakude	SUmk	EPI_ISL_529754	29816	Unkown	Oro-pharyngeal swab	Live	KRISP, KZN Research Innovation and Sequencing Platform	Giandhari J, Pillay S, Lessells R, Mdlalose K, York D, Khan S, Tegally H, Wilkinson E, de Oliveira T
126	South Africa	Umkhanyakude	SUmk	EPI_ISL_529752	29864	Unkown	Oro-pharyngeal swab	Live	KRISP, KZN Research Innovation and Sequencing Platform	Giandhari J, Pillay S, Lessells R, Mdlalose K, York D, Khan S, Tegally H, Wilkinson E, de Oliveira T
127	South Africa	Umkhanyakude	SUmk	EPI_ISL_529751	29819	Unkown	Oro-pharyngeal swab	Live	KRISP, KZN Research Innovation and Sequencing Platform	Giandhari J, Pillay S, Lessells R, Mdlalose K, York D, Khan S, Tegally H, Wilkinson E, de Oliveira T
128	South Africa	Umkhanyakude	SUmk	EPI_ISL_515892	29860	Unkown	Oro-pharyngeal swab	Live	KRISP, KZN Research Innovation and Sequencing Platform	Giandhari J, Pillay S, Lessells R, Mdlalose K, York D, Khan S, Tegally H, Wilkinson E, de Oliveira T
129	South Africa	Umzinyathi	SUmz	EPI_ISL_515729	29827	Unkown	Oro-pharyngeal swab	Live	KRISP, KZN Research Innovation and Sequencing Platform	Giandhari J, Pillay S, Lessells R, Mdlalose K, York D, Khan S, Tegally H, Wilkinson E, de Oliveira T
130	South Africa	Umzinyathi	SUmz	EPI_ISL_515719	29813	Unkown	Oro-pharyngeal swab	Live	KRISP, KZN Research Innovation and Sequencing Platform	Giandhari J, Pillay S, Lessells R, Mdlalose K, York D, Khan S, Tegally H, Wilkinson E, de Oliveira T
131	South Africa	Umzinyathi	SUmz	EPI_ISL_515707	29824	Unkown	Oro-pharyngeal swab	Live	KRISP, KZN Research Innovation and Sequencing Platform	Giandhari J, Pillay S, Lessells R, Mdlalose K, York D, Khan S, Tegally H, Wilkinson E, de Oliveira T
132	South Africa	Umzinyathi	SUmz	EPI_ISL_515667	29853	Unkown	Oro-pharyngeal swab	Live	KRISP, KZN Research Innovation and Sequencing Platform	Giandhari J, Pillay S, Lessells R, Mdlalose K, York D, Khan S, Tegally H, Wilkinson E, de Oliveira T
133	South Africa	Uthukela	SUt	EPI_ISL_529802	29840	Unkown	Oro-pharyngeal swab	Live	KRISP, KZN Research Innovation and Sequencing Platform	Giandhari J, Pillay S, Lessells R, Mdlalose K, York D, Khan S, Tegally H, Wilkinson E, de Oliveira T
134	South Africa	Uthukela	SUt	EPI_ISL_529799	29861	Unkown	Oro-pharyngeal swab	Live	KRISP, KZN Research Innovation and Sequencing Platform	Giandhari J, Pillay S, Lessells R, Mdlalose K, York D, Khan S, Tegally H, Wilkinson E, de Oliveira T
135	South Africa	Uthukela	SUt	EPI_ISL_529800	29827	Unkown	Oro-pharyngeal swab	Live	KRISP, KZN Research Innovation and Sequencing Platform	Giandhari J, Pillay S, Lessells R, Mdlalose K, York D, Khan S, Tegally H, Wilkinson E, de Oliveira T
136	South Africa	Uthukela	SUt	EPI_ISL_529786	29822	Unkown	Oro-pharyngeal swab	Live	KRISP, KZN Research Innovation and Sequencing Platform	Giandhari J, Pillay S, Lessells R, Mdlalose K, York D, Khan S, Tegally H, Wilkinson E, de Oliveira T
137	South Africa	Uthungulu	SUt	EPI_ISL_529735	29851	Unkown	Oro-pharyngeal swab	Live	KRISP, KZN Research Innovation and Sequencing Platform	Giandhari J, Pillay S, Lessells R, Mdlalose K, York D, Khan S, Tegally H, Wilkinson E, de Oliveira T
138	South Africa	Uthungulu	SUt	EPI_ISL_529723	29842	Unkown	Oro-pharyngeal swab	Live	KRISP, KZN Research Innovation and Sequencing Platform	Giandhari J, Pillay S, Lessells R, Mdlalose K, York D, Khan S, Tegally H, Wilkinson E, de Oliveira T
139	South Africa	Uthungulu	SUt	EPI_ISL_495547	29830	Unkown	Oro-pharyngeal swab	Live	KRISP, KZN Research Innovation and Sequencing Platform	Giandhari J, Pillay S, Lessells R, Mdlalose K, York D, Khan S, Tegally H, Wilkinson E, de Oliveira T
140	South Africa	Uthungulu	SUt	EPI_ISL_495544	29823	Unkown	Oro-pharyngeal swab	Live	KRISP, KZN Research Innovation and Sequencing Platform	Giandhari J, Pillay S, Lessells R, Mdlalose K, York D, Khan S, Tegally H, Wilkinson E, de Oliveira T
141	South Africa	Zululand	SZu	EPI_ISL_515870	29859	Unkown	Oro-pharyngeal swab	Live	KRISP, KZN Research Innovation and Sequencing Platform	Giandhari J, Pillay S, Lessells R, Mdlalose K, York D, Khan S, Tegally H, Wilkinson E, de Oliveira T
142	South Africa	Zululand	SZu	EPI_ISL_515868	29829	Unkown	Oro-pharyngeal swab	Live	KRISP, KZN Research Innovation and Sequencing Platform	Giandhari J, Pillay S, Lessells R, Mdlalose K, York D, Khan S, Tegally H, Wilkinson E, de Oliveira T
143	South Africa	Zululand	SZu	EPI_ISL_515867	29828	Unkown	Oro-pharyngeal swab	Live	KRISP, KZN Research Innovation and Sequencing Platform	Giandhari J, Pillay S, Lessells R, Mdlalose K, York D, Khan S, Tegally H, Wilkinson E, de Oliveira T
144	South Africa	Zululand	SZu	EPI_ISL_515799	29860	Unkown	Oro-pharyngeal swab	Live	KRISP, KZN Research Innovation and Sequencing Platform	Giandhari J, Pillay S, Lessells R, Mdlalose K, York D, Khan S, Tegally H, Wilkinson E, de Oliveira T
145	Tunisia	Ben Arous	TBA	EPI_ISL_458286	29611	unknown	Nasal Swab	unknown	Bundeswehr Institute of Microbiology	Handrick,S., Bestehorn-Willmann,M.S., Eckstein,S., Walter,M.C., Antwerpen,M.H., Rehn,A., Naija,H., Stoecker,K., Woelfel,R. and Ben Moussa,M.
